# 1 Long-read sequencing reveals the RNA isoform repertoire 2 of neuropsychiatric risk genes in human brain

3

4 Ricardo De Paoli-Iseppi<sup>1\*</sup>, Shweta Joshi<sup>1</sup>, Josie Gleeson<sup>1</sup>, Yair David Joseph Prawer<sup>1</sup>, Yupei You<sup>2,3</sup>, Ria  
5 Agarwal<sup>1</sup>, Anran Li<sup>1</sup>, Anthea Hull<sup>1</sup>, Eloise Marie Whitehead<sup>1</sup>, Yoonji Seo<sup>1</sup>, Rhea Kujawa<sup>1</sup>, Raphael Chang<sup>1</sup>,  
6 Mriga Dutt<sup>1</sup>, Catriona McLean<sup>4,5</sup>, Benjamin Leo Parker<sup>1</sup>, Michael Ben Clark<sup>1\*</sup>

7 <sup>1</sup>Department of Anatomy and Physiology, The University of Melbourne, Parkville, VIC, Australia

8 <sup>2</sup>School of Mathematics and Statistics/Melbourne Integrative Genomics, The University of Melbourne,  
9 Parkville, VIC, Australia

10 <sup>3</sup>The Walter and Eliza Hall Institute of Medical Research, Parkville, VIC, Australia

11 <sup>4</sup>Department of Anatomical Pathology, Alfred Health, Melbourne, Victoria, Australia

12 <sup>5</sup>Victorian Brain Bank, The Florey, Parkville, Victoria, Australia

13 \*Corresponding authors

## 14 Abstract

15 Neuropsychiatric disorders are highly complex conditions and the risk of developing a disorder has  
16 been tied to hundreds of genomic variants that alter the expression and/or products (isoforms) made  
17 by risk genes. However, how these genes contribute to disease risk and onset through altered  
18 expression and RNA splicing is not well understood. Combining our new bioinformatic pipeline  
19 IsoLamp with nanopore long-read amplicon sequencing, we deeply profiled the RNA isoform  
20 repertoire of 31 high-confidence neuropsychiatric disorder risk genes in human brain. We show most  
21 risk genes are more complex than previously reported, identifying 363 novel isoforms and 28 novel  
22 exons, including isoforms which alter protein domains, and genes such as *ATG13* and *GATAD2A*  
23 where most expression was from previously undiscovered isoforms. The greatest isoform diversity  
24 was present in the schizophrenia risk gene *ITIH4*. Mass spectrometry of brain protein isolates  
25 confirmed translation of a novel exon skipping event in *ITIH4*, suggesting a new regulatory  
26 mechanism for this gene in brain. Our results emphasize the widespread presence of previously  
27 undetected RNA and protein isoforms in brain and provide an effective approach to address this  
28 knowledge gap. Uncovering the isoform repertoire of neuropsychiatric risk genes will underpin future  
29 analyses of the functional impact these isoforms have on neuropsychiatric disorders, enabling the  
30 translation of genomic findings into a pathophysiological understanding of disease.

## 31 Keywords

32 RNA, splicing, neuropsychiatric, brain, long-read, nanopore, isoform

## 33 Introduction

34 Over 90% of multi-exonic human genes undergo alternative splicing (AS), a process that enables  
35 genes to produce multiple mRNA products (RNA isoforms) [1]. Common AS events include exon  
36 skipping, intron retention and alternative 5' and 3' exonic splice sites [2]. These mRNA alterations  
37 can impact the open reading frame (ORF) and/or alter post-transcription regulation of an RNA.

NOTE: This preprint reports new research that has not been certified by peer review and should not be used to guide clinical practice.

38 increasing both transcriptomic and proteomic diversity [1, 3, 4]. AS has been established as an  
39 important regulator of organ development and physiological functions and is highly regulated under  
40 normal conditions [5, 6]. Conversely, aberrant RNA splicing has been linked to the development of  
41 cancer, autoimmune and neurodevelopmental disorders [7-11]. AS plays an especially important role  
42 in the brain, which has a distinct splicing program including the largest number of tissue specific  
43 exons and frequent use of microexons [12]. Numerous studies have reported crucial roles for AS in  
44 brain development and dysregulation in disease [13, 14].

45 Neuropsychiatric or mental health disorders (MHDs) including schizophrenia (SZ), major depressive  
46 disorder (MDD), autism spectrum disorder (ASD) and bipolar disorder (BD) can carry significant  
47 morbidity for affected individuals [15]. Comorbidities, delayed diagnoses and stigma surrounding  
48 MHDs also present a significant challenge to individuals and their families [16]. However, treatment  
49 options remain limited or are not well tolerated or effective in some individuals and the underlying  
50 aetiology of disease and risk remains poorly understood [17-19]. Recently, genome wide association  
51 studies (GWAS) have revealed hundreds of common single nucleotide polymorphisms (SNPs) that  
52 are associated with risk of developing neuropsychiatric disease [20-25]. Confirmatory studies  
53 including transcriptome wide association studies (TWAS), summary data-based Mendelian  
54 randomization (SMR) [26], multimarker analysis of genomic annotation (MAGMA) and variants (H-  
55 MAGMA [27], nMAGMA [28]) and functional genomics have helped to identify the risk genes at  
56 these loci and also showed a considerable number of risk loci are shared between disorders [29].  
57 Understanding how risk variants affect risk genes is not straightforward, the vast majority of risk  
58 variants are found in non-coding parts of the genome and are expected to be regulatory, impacting  
59 gene expression levels or which RNA isoforms are produced. Risk variants may impact splicing factor  
60 binding leading to altered isoform splicing ratios [8]. For example, a risk variant block (rs1006737)  
61 within intron 3 of the SZ risk gene *CACNA1C* was linked to variable mRNA expression, while *GADI*  
62 long and short isoform expression in hippocampus was associated with the SZ and ASD risk variant  
63 (rs3749034) within the promoter [30, 31]. However, there is a current lack of understanding about  
64 how risk gene expression and splicing are altered by the risk variants and therefore profiling both their  
65 expression and RNA isoforms is essential to link genetic changes to disease pathophysiology.

66 Current sequencing technologies including Illumina short-reads perform well at detecting novel AS,  
67 however the lack of long-range exon connectivity information inherent in short-reads means these  
68 approaches are limited in their ability to identify and quantify full-length isoforms and this issue is  
69 exacerbated in longer, more complex genes [32, 33]. In contrast, long-read technologies including  
70 Oxford Nanopore Technologies (ONT) and Pacific Biosciences (PacBio) can sequence entire  
71 isoforms in a single read enabling more accurate isoform profiling [7, 34]. Such technologies now  
72 make it feasible to comprehensively examine gene isoform profiles. Initial investigations of *SNX19*  
73 and *CACNA1C* demonstrated the incomplete knowledge of isoform profiles in humans and the likely  
74 importance of novel gene isoforms in disease risk [35, 36].

75 In this study we addressed the lack of knowledge surrounding MHD risk gene isoform expression  
76 using nanopore amplicon sequencing. We developed a new bioinformatic tool, IsoLamp, to identify  
77 known and novel RNA isoforms from long-read data. Analysis of the RNA splicing profiles of 31  
78 MHD risk genes identified 363 novel RNA isoforms and 28 novel exons. We identified several genes  
79 where most expression is from novel isoforms, including *ATG13* and *GATAD2A*, where the most  
80 highly expressed isoforms were novel. Our results show the transcript structure for most risk genes is  
81 more complex than current annotations, containing additional exon skipping events, retained introns,  
82 novel splice sites and novel exons, including novel isoforms that alter the protein and potentially its

83 function. This work lays the foundation for a better understanding of how risk gene isoforms may play  
 84 a role in disease pathophysiology.

85

86 **A**

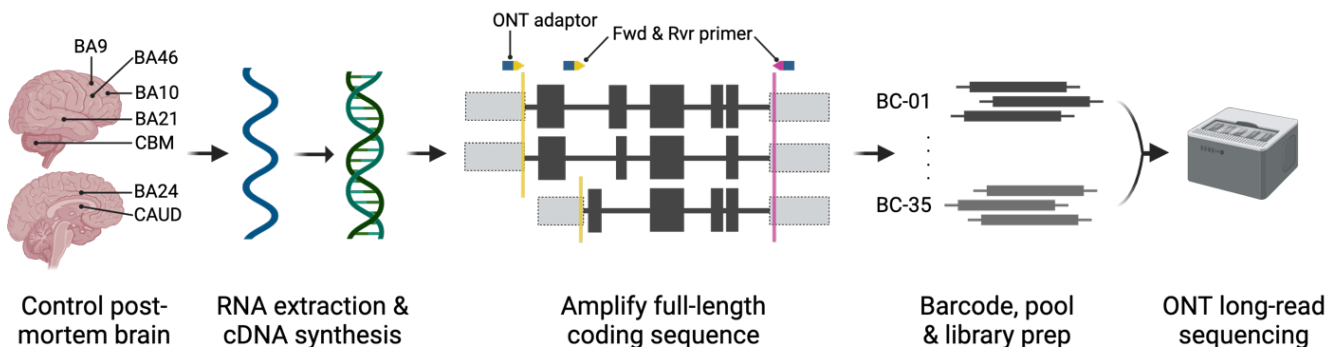

87

88 **B**

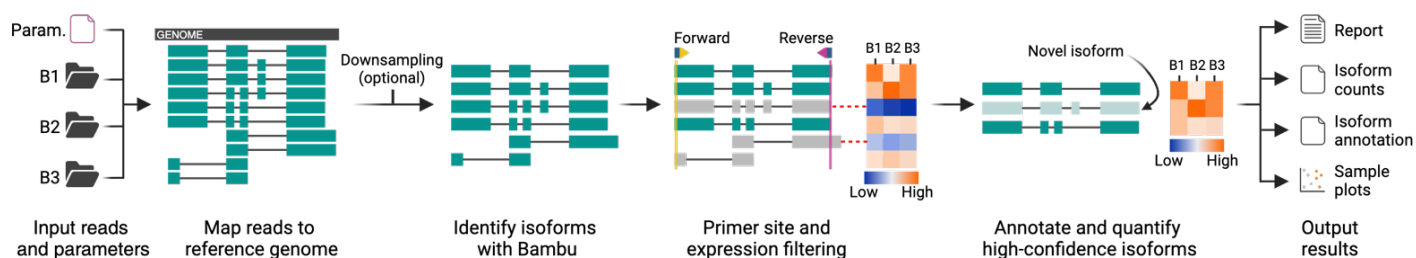

89

90 **Figure 1A. RNA isoform sequencing of human post-mortem brain.** RNA was isolated from frontal cortical  
 91 regions, caudate (CAUD) and cerebellum (CBM) and converted to cDNA. The coding sequence (black boxes)  
 92 was amplified using specific forward (Fwd, yellow arrows) and reverse (Rvr, pink arrow) primers generally  
 93 designed in the 5' and 3' UTR regions (grey boxes) to capture as many isoforms as possible. An Oxford  
 94 Nanopore Technologies (ONT) adaptor sequence (blue box) was incorporated into each primer for sample  
 95 multiplexing. Samples were then barcoded and pooled to create a single library for long-read sequencing on a  
 96 GridION. Key: Brodmann Area (BA), barcode (BC), Oxford Nanopore Technologies (ONT). **B. Isoform discovery  
 97 with long-read amplicon sequencing (IsoLamp) workflow.** A gene specific parameters file (containing  
 98 chromosome and primer coordinates) was used to align long-reads for each sample (B1-3) against the  
 99 reference (black box) using Minimap2. Known and novel RNA isoforms were identified using BamBU. Identified  
 100 isoforms are then filtered (grey isoforms) to remove those not overlapping forward (yellow line) and reverse  
 101 (pink line) primer positions, ensuring full-length isoform discovery. Low expression (blue on heatmap) isoforms  
 102 were also filtered out as indicated by dashed red lines. Filtered known and novel isoforms can then be  
 103 annotated, quantified using IsoLamp output files and visualised using IsoVis.

104

## 105 **Results**

### 106 **Experimental overview**

107 To identify the RNA isoforms expressed from genes of interest, collated from GWAS evidence, we  
108 aimed to perform long-read amplicon sequencing, which provides a highly sensitive means for  
109 comprehensive isoform discovery and relative quantification (Figure 1A, Supplementary Figure 1)  
110 [35]. We selected seven regions of post-mortem human brain from five control individuals,  
111 encompassing both transcriptionally divergent regions as well as those highly implicated in MHDs  
112 (Supplementary Table 1). Amplicons were designed cover the full coding region of target genes and,  
113 where possible, run from the first to the last exon. Multiple set of primers were used for genes with  
114 alternative transcriptional initiation and termination exons and/or alternative coding sequence  
115 initiation and termination sites.

### 116 **IsoLamp: a tool for RNA isoform discovery from long-read amplicon sequencing**

117 While there are several long-read isoform discovery and quantification tools, these are not generally  
118 optimised for amplicon sequencing of single genes at high depth. Therefore, we created ISOform  
119 discovery with Long-read AMPlicon sequencing (IsoLamp), a custom pipeline designed for isoform  
120 profiling from amplicon sequencing (Figure 1B). In contrast to previous tools [35] IsoLamp can be  
121 applied to any gene, provides flexible filtering options and provides a simpler, unified, output of  
122 isoforms.

123 We benchmarked the performance of IsoLamp using synthetic Spike-in RNA variants (SIRVs) that  
124 provide a known ground truth for isoform exonic structures and abundances. We performed long-read  
125 amplicon sequencing on SIRV5 and SIRV6, targeting five isoforms per gene, as these SIRVs allowed  
126 targeting of the largest number of isoforms with a single primer pair and so best recapitulated human  
127 genes. The SIRV dataset comprised nine replicates from each of the three SIRV mixes (E0, E1, E2)  
128 for each gene (Supplementary Figure 2). 99% of reads mapped to the SIRV genome with minimap2  
129 [37], confirming on-target amplification. We benchmarked the performance of IsoLamp with Bambu  
130 [38], FLAIR [39], FLAMES [40] and Stringtie2 (-L) [41]. We assessed the precision, recall and  
131 expression correlations of the five tools using three different reference annotations (Figure 2A-C,  
132 Supplementary Figure 3, Supplementary Table 2): **1.** Complete - contains all SIRV isoforms, **2.**  
133 Insufficient - missing SIRV isoforms known to be present, and **3.** Over – contains additional isoforms  
134 that are not present in the SIRV mixes.

135 Our benchmarking results demonstrated IsoLamp had the highest precision and recall values,  
136 consistently outperforming other isoform discovery tools by correctly identifying true isoforms and  
137 minimising false positives (Figure 2A, Supplementary Table 2). This included maintaining high  
138 performance with the more challenging, but also more realistic, insufficient and over annotation  
139 references. IsoLamp expression quantification was also consistently accurate and maintained  
140 performance irrespective of the annotation provided (Figure 2B, C).

141 Bambu, which is also utilised within the IsoLamp pipeline, was the next best performing tool,  
142 although it identified more false positives and had poorer recall and quantification results using the  
143 insufficient annotation (Figure 2A-C). IsoLamp utilises Bambu parameters optimised for amplicon-  
144 sequencing, including a novel discovery rate (NDR) of 1. Adjusting the Bambu 'NDR' to 1 improved  
145 its recall but didn't improve precision (Figure 2A-C, Supplementary Table 2). These results  
146 demonstrate how IsoLamp outperforms tools designed for whole-transcriptome analysis, including  
147 when Bambu is provided with optimised isoform discovery parameters for amplicon sequencing.

148 FLAIR had the highest number of isoforms of all tools tested identifying 261, 181, and 278 novel  
 149 transcripts in the complete, insufficient, and over-annotated reference-based analyses, respectively. This  
 150 high level of false-positive novel transcripts led to inaccuracies in transcript abundance assignments,  
 151 resulting in low correlations compared to other tools (Figure 2A-C). FLAMES exhibited 100% recall  
 152 for SIRV5 across all annotations, however, its performance with SIRV6 was suboptimal, indicating a  
 153 higher degree of variability in the FLAMES isoform discovery pipeline. FLAMES also performed  
 154 poorly for isoform quantification. Lastly, while Stringtie2 did not introduce large numbers of false  
 155 positives, it had the highest number of false negatives, including when provided with complete  
 156 annotations (Figure 2A-C, Supplementary Table 2).

157 IsoLamp employs an optimised expression-based filter to remove lowly expressed isoforms that are  
 158 likely to be false positive detections. Applying this filter to Bambru, FLAIR, and FLAMES  
 159 substantially reduced false positive novel isoforms and enhanced overall precision (Supplementary  
 160 Figure 3, Supplementary Table 2), though IsoLamp was still the top performing tool. Beyond  
 161 synthetic benchmarking data, reference annotations are typically a combination of insufficient and  
 162 over annotations. In such scenarios, IsoLamp demonstrated better or comparable correlations with all  
 163 other tools (Figure 1A-C, Supplementary Figure 3), suggesting its superiority for amplicon-  
 164 sequencing based isoform discovery and quantification from real biological data.  
 165

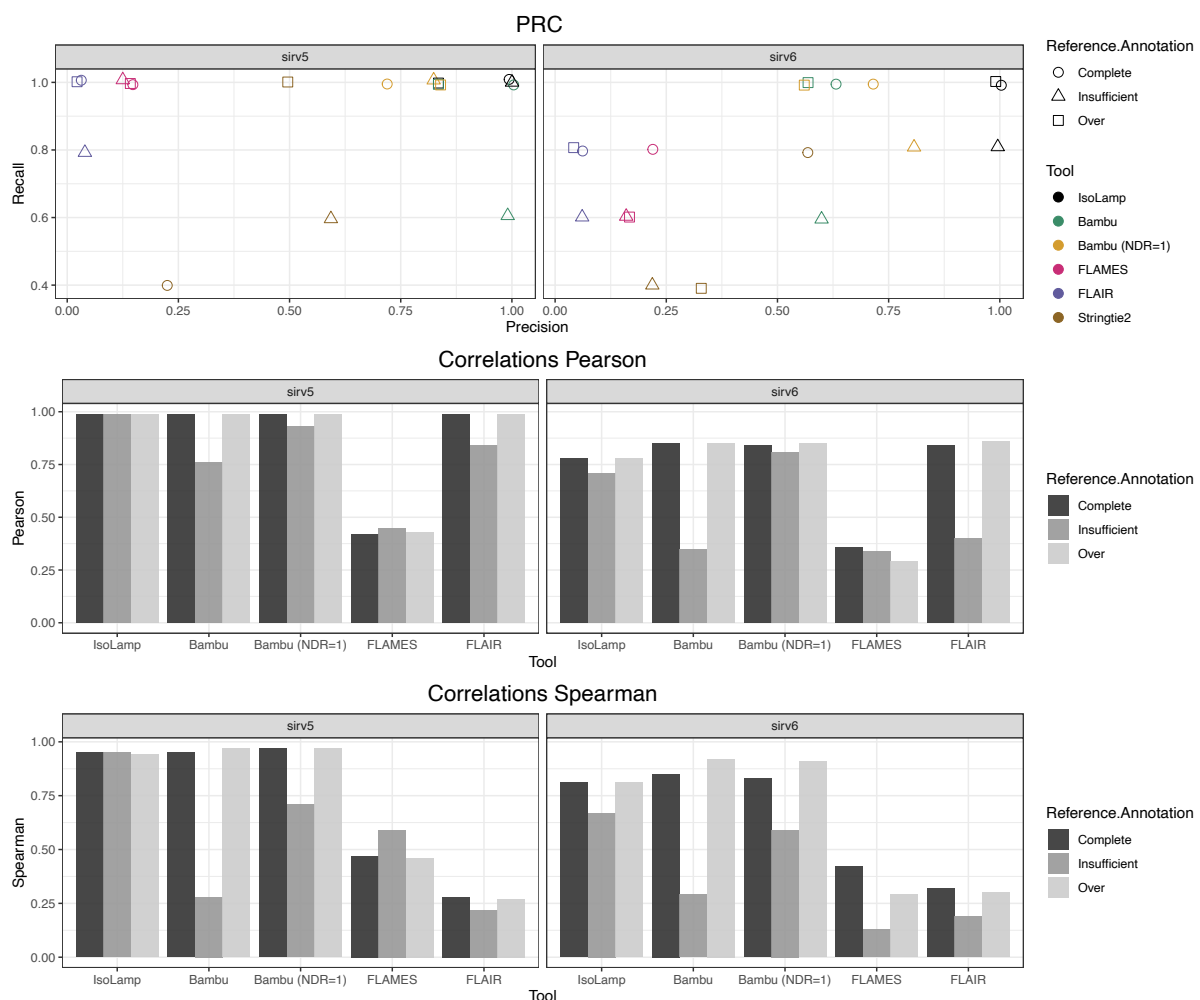

166

167 **Figure 2. Benchmarking IsoLamp using spike-in SIRVs. A.** Precision recall of each tested pipeline with the  
 168 complete, insufficient or over annotated SIRV reference. IsoLamp (black) returned high quality isoforms from  
 169 amplicon data of both SIRV5 and 6. Pearson (B) and Spearman (C) correlations for each pipeline between  
 170 known and observed expression values for SIRV 5 and 6 mixes.

## 171 **Post-mortem human brain RNA quantity and quality**

172 Total RNA for long-range amplicon sequencing was extracted from 7 brain regions from 5 healthy  
173 individuals (Ind01 - 05) and subject to sample QC (Supplementary Figure 4A-D). RINe (mean = 7.4,  
174 range = 6 - 8.1) did not differ by brain region, however Ind04 had significantly lower RINe scores  
175 (Supplementary Figure 4B). No trend between the PMI (mean = 44.25 hrs) and RINe was observed  
176 (Supplementary Figure 4C). RINe appeared to worsen with decreasing brain tissue pH levels  
177 (Supplementary Figure 4D). A principal component analysis (PCA) showed separation of Ind04  
178 (likely driven by lower sample pH and RINe) and of cerebellum and caudate samples from cortical  
179 regions in PC1 and PC2 (Supplementary Figure 5AB). A relatively small proportion of variance  
180 (4.7%) was attributed to control donor age in PC6 (Supplementary Figure 5C).

## 181 **Long read sequencing identifies 363 novel RNA isoforms**

182 A total of 31 risk genes were selected for amplicon sequencing based on the accumulated evidence for  
183 their involvement in neuropsychiatric disorder risk. A custom database of risk genes and their  
184 evidence levels was created and genes ranked (Methods). In a reflection of current GWAS cohort  
185 sizes, 21 of the selected genes had the highest evidence for involvement in risk for SZ, 7 for MDD, 2  
186 for ASD and 1 for BPD (Figure 3A). Evidence from GWAS, TWAS and other studies show that some  
187 genes appear to be risk factors for multiple disorders including *KLC1* for SZ, MDD and ASD (Figure  
188 3B).

189 The full RNA isoform profile for each gene was sequenced using nanopore long-read amplicon  
190 sequencing. Mapping accuracy ranged from 93.7% (*CLCN3*) to 97.5% (*SORCS3*) (Supplementary  
191 Figure 6A, B). Each novel isoform and its predicted impact on known protein domains, open reading  
192 frame (ORF) and associated instability index was recorded (Additional File 1) and visualised using  
193 IsoVis (Additional File 2) (Wan et al., 2024, *under review*). With no TPM filter set in IsoLamp we  
194 identified 872 known and novel isoforms across all 31 neuropsychiatric disorder risk genes. To filter  
195 this list for more highly expressed novel isoforms we applied a TPM filter which resulted in 441  
196 known and novel isoforms across all genes (Figure 4A). Of these, SQANTI [42] classified 78 as  
197 known (full splice match (FSM)), 256 as novel but using known splice sites or junctions (novel in  
198 catalogue (NIC)), and 107 as containing at least one novel splice site (novel not in catalogue (NNC))  
199 (Figure 4A).

200 We next asked what proportion of reads for each gene were assigned to novel isoforms (Figure 4B).  
201 This ranged widely from approximately 96.9% for *GATAD2A* to 0% for *GRIN2A*, which was the only  
202 gene for which no novel RNA isoforms were detected. Approximately one quarter (7/31) of genes  
203 investigated had most of their gene expression assigned to novel isoforms, demonstrating how  
204 isoforms and their expression profiles for many genes are still poorly understood. As our amplicon-  
205 sequencing does not encompass all variations in transcriptional initiation and termination sites, these  
206 results can be seen as a lower bound for the number of novel isoforms. Linear regression of gene  
207 isoform counts (Supplementary Figure 7) and novel isoform proportion did not reveal a significant  
208 relationship with amplicon length or canonical exon count, indicating that detection of novel isoforms  
209 is largely gene dependent (Supplementary Figure 8A-D). To determine what was different about the  
210 splicing pattern of each novel isoform we further sub-classified them using SQANTI, based on the use  
211 of a combination of known exon junctions (COJ) or splice sites (COS), retained intron (RI) or  
212 containing at least one novel splice site (ALO) (donor, acceptor or pair) [42]. Overall, the most reads  
213 were assigned to “novel combination of known junctions”, where all individual exon combination  
214 were known but the entire chain of exons was novel. The type and proportion of novel isoforms from

215 each category was highly gene specific, demonstrating a wide variety of novel RNA types missing  
 216 from current gene annotations.

217

218 **A**

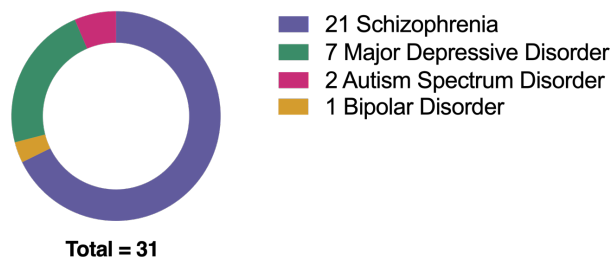

219

220 **B**

221

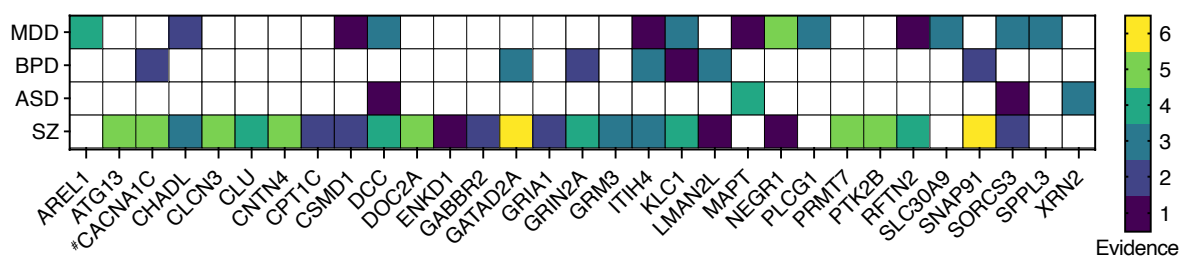

222

223 **Figure 3. Selection of high-confidence MHD risk genes for amplicon sequencing. A.** Risk genes included in this  
 224 study classified by the disorder for which they have the highest evidence of association. **B.** Sequenced genes  
 225 and their evidence levels for each MHD. The evidence count was calculated as the sum of independent analysis  
 226 types for example, GWAS, MAGMA, TWAS, SMR, DNA methylation, fine mapping, protein-protein interaction  
 227 and targeted validation studies, that supported gene involvement in risk for a particular disorder. #Indicates re-  
 228 sequencing of a gene from a previous study (Clark *et al.* 2019).

229

230 A

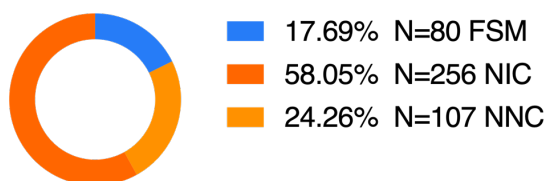

Total = 441

231

232 B

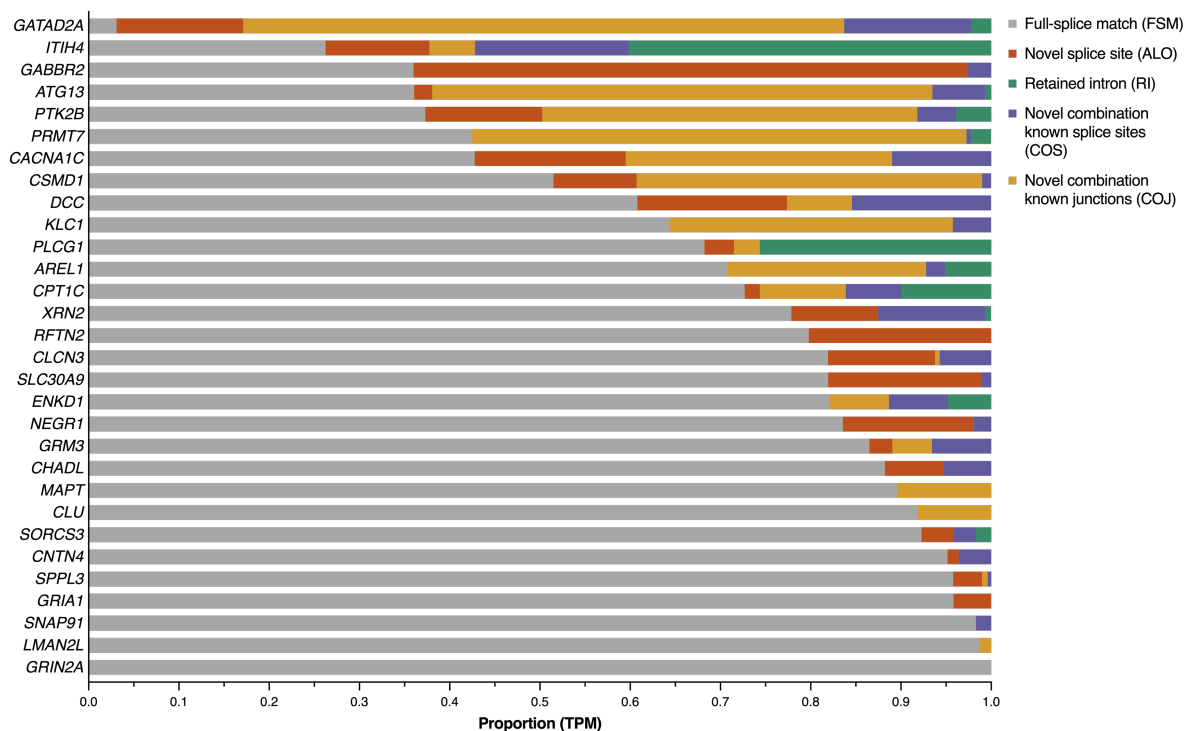

233

234 C

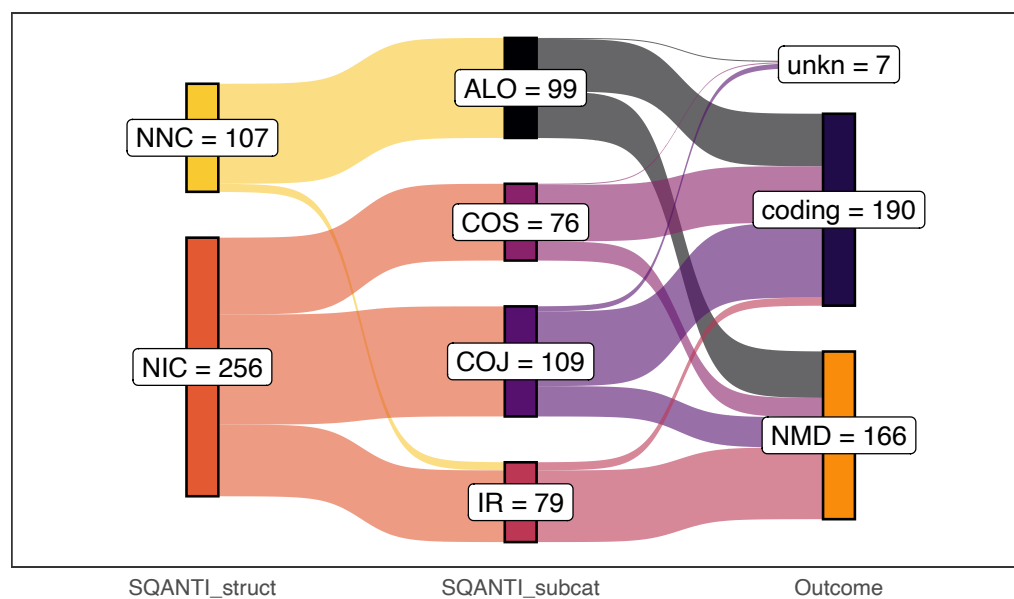

235



236 **Figure 4. A.** The total number of known and novel isoforms identified across all 31 risk genes. SQANTI  
237 structural categories are known/full splice match (FSM), novel in catalogue (NIC) and novel not in catalogue  
238 (NNC). **B.** Proportion of reads (reported as transcript per million, TPM) for each gene as classified by the  
239 SQANTI sub-category. **C.** Count of predicted outcomes for novel isoform subcategories. Expsy [55] was used  
240 to examine the open reading frame (ORF) of novel isoforms (SQANTI structural category: novel not in  
241 catalogue (NNC) or novel in catalogue (NIC)) using the canonical start and stop as a reference. Predictions were  
242 categorised as coding if the ORF was retained, nonsense mediated decay (NMD) if a premature termination  
243 codon was present and not within 50 nt of the final exon junction or unknown (unkn) if there was not enough  
244 information. Novel isoform SQANTI subcategories (subcat) are, at least one novel splice site (ALO), intron  
245 retention (IR) and combination of known junctions (COJ) or splice sites (COS).

246

247 The impact of each novel isoform on the encoded ORF was examined using Expsy [43] and recorded  
248 as retaining the canonical or other known reading frame (coding), likely-NMD or unknown. Novel  
249 isoforms were classified as coding for 54.2%, 67.3% and 75.4% for ALO, COJ and COS  
250 subcategories respectively. We identified 49 novel isoforms that contained retained introns, 39 (83%)  
251 of which were predicted to lead to NMD (Figure 4C). Our results were also useful for several genes in  
252 identifying the probable isoforms represented by GENCODE transcript fragments. For the SZ risk  
253 gene clusterin (*CLU*), the novel Tx1 (COJ) extended ENST00000520796 to the canonical stop codon  
254 and suggested this isoform is moderately abundant (8.2% of TPM) across all brain tissues. The ASD  
255 risk gene microtubule associated protein tau (*MAPT*) novel Tx5 extended ENST00000703977 and  
256 further demonstrated that inclusion of canonical exon 7 (chr17:45,989,878-45,990,075) does not  
257 always exhibit coordinated splicing with canonical exon 5. This isoform had moderate expression  
258 comprising 3.2% of *MAPT* TPM.

259 Isoforms that contained ‘at least one novel splice site’ (ALO) generally contained a novel deletion  
260 within a known exon or had novel donors and/or acceptors. All novel junctions in ALO isoforms were  
261 canonical GT-AG, GC-AG or AT-AC junction pairs, though often only the splice donor (GT) or  
262 acceptor (AG) was novel, for example a novel splice acceptor (+98 nt) for *CPTIC* exon 17  
263 (Supplementary Figure 9A, B). We found that ~48% of ALO isoforms contained either a single novel  
264 splice donor or acceptor. Novel GC-AG pairing was detected in two SZ risk genes, within the 5’UTR  
265 of *GABBR2* and the donor site of a validated novel exon in *RFTN2*. These results show a clear  
266 advantage of using long-read sequencing to contextualise novel splice sites which aids in predicting  
267 the outcome on the isoform and ORF.

## 268 **Detection of highly expressed novel isoforms**

269 A key question regarding novel isoforms is whether they are expressed at high enough level to impact  
270 the biological function of a gene. This is a complex question, because a novel isoform could be low at  
271 the tissue level but highly abundant in a specific cell type, or multiple expressed novel isoforms can  
272 be significant cumulatively, especially if they all encode the same change to a protein. Therefore, we  
273 focused on genes with significant individual or cumulative expression of novel isoforms (analysis on  
274 all gene isoforms is available in Additional File 2).

275 We identified 22 novel isoforms for the schizophrenia risk gene autophagy-related protein 13  
276 (*ATG13*). Novel isoforms represented 64% of gene expression, compared to 36% for full-splice  
277 matches. The most abundant class of novel isoforms (15/22) were COJ, which made up 55.4% of gene  
278 expression (Figure 4B). *ATG13* had two alternative splicing hotspots, firstly with the 5’UTR and  
279 secondly around a predicted disordered region involving exons 12 and 13 in the canonical isoform.  
280 Across all brain regions the most highly expressed isoform was the novel COJ transcript 26 (Tx26),

281 which represented 23% of TPM, surpassing the canonical transcript ENST00000683050 (12.8%).  
282 Tx26 differs from the canonical transcript by skipping of exon 12 (Figure 5A, B). It contains the same  
283 CDS as ENST00000359513 but includes an additional exon in the 5'UTR (exon 3). Novel COJ  
284 transcripts 6 and 8 also had high TPMs and together accounted for 16.6% of expression. These  
285 isoforms were novel due to a combination of 5'UTR exons not previously seen within full-length  
286 GENCODE annotations.

287 The schizophrenia risk gene CUB and sushi multiple domains 1 (*CSMD1*) was the longest CDS we  
288 amplified at approximately 10,838 nt encompassing 70 coding exons. In total, 8/9 detected isoforms  
289 were classified as novel (Additional File 2I). Following the canonical isoform (ENST00000635120,  
290 51.5% of TPM), novel transcripts 26 (COJ) and 33 (ALO) accounted for 38.3% and 7.1% of isoform  
291 TPMs, respectively (Figure 5C, D). Novel Tx26 skipped known exon 65 which encodes a sushi 28  
292 extracellular domain and glycosylation site. The ORF of Tx26 retained the reading frame encoding a  
293 3549 amino acid (aa) protein. Novel Tx33 contained a novel splice donor (GT, -8 nt) in canonical  
294 exon 21 and was predicted to encode a PTC in canonical exon 22. The full Tx33 mRNA also skipped  
295 canonical exon 65. *CSMD1* also provides a useful example of the benefit of long read for profiling  
296 isoforms. GTEx isoform expression data (<https://www.gtexportal.org/home/gene/CSMD1>) for  
297 *CSMD1* in brain is almost exclusively assigned to isoforms with downstream transcriptional initiation  
298 sites (including the two-exon fragment ENST00000521646), despite splice junction level expression  
299 largely supporting expression from the canonical start site. This emphasises the difficulty of  
300 assembling and quantification expression of full-length isoforms from long, complex genes, which  
301 can be achieved using long isoform spanning reads.

302 The chromatin remodelling subunit and shared SZ and BPD risk gene GATA zinc finger domain  
303 containing 2A (*GATAD2A*) had one of the highest proportions of reads (96.9%) assigned to novel  
304 isoforms (Additional File 2N). Most novel isoforms were predicted to be coding COJs (10/24) and  
305 these also accounted for the majority of novel expression (66.6%). Novel Tx17 had the highest  
306 expression level (22.7%) of any *GATAD2A* isoform and skipped canonical exon 10 which overlaps a  
307 CpG island (212 nt, 21.7% CpG) and contains a disordered, polar residue biased region and a  
308 phosphorylation site (Figure 5E). Two additional novel isoforms (Txs 8 and 12), together accounting  
309 for 19.9% of expression, incorporated a known 89 nt 5'UTR exon (ENST00000494516) into full-  
310 length isoforms for the first time, clarifying the isoforms expressed from this gene. It is important to  
311 note that there are two known start sites for this gene supported by high levels of CAGE reads and  
312 human mRNA. The forward primer used in this study was located within the 5'UTR of  
313 ENST00000360315 and as such expression levels of alternatively spliced isoforms from  
314 ENST00000683918 are not included in this analysis (Supplementary Table 3).

315 Several additional genes had relatively high levels of at least one novel isoform including the SZ risk  
316 genes kinesin light chain 1 (*KLC1*), protein tyrosine kinase 2 beta (*PTK2B*) and protein arginine  
317 methyltransferase 7 (*PRMT7*). *KLC1* novel transcript 1, 31.4% of gene TPM, was predicted to retain  
318 the canonical ORF and included a known (ENST00000380038) splice acceptor (+75 nt) with an  
319 alternative 3' end (Additional File 2S). *PTK2B* novel transcripts 25 and 11 together accounted for  
320 ~42% of total expression and both had variable splicing, including a novel donor (GT, +141nt), of the  
321 5'UTR exon 5 (ENST00000519650) (Additional File 2Y). *PRMT7* novel transcript 18, 12.3% of  
322 TPM, skips canonical exon 4 which may lead to NMD or alternatively, use a supported  
323 (ENST00000686053) translation start site in the following exon (Additional File 2X).

324 The full RNA isoform profile for the SZ risk gene calcium voltage-gated channel subunit alpha 1 C  
325 (*CACNA1C*) has previously been reported and was repeated in this study [35]. In total, we identified 5

326 annotated and 22 novel isoforms. The most highly expressed novel isoform identified in our previous  
327 study, ‘novel 2199’, now known as ENST00000682835.1 was also identified in our samples and  
328 exhibited similar cerebellar specific expression. Importantly, 10 novel isoforms replicated one of two  
329 alternative splicing events in a hotspot identified previously in canonical exon 7 [35]. This hotspot  
330 contains the canonical splice site and two alternative 3’SS acceptors over only 12 nucleotides (chr12:  
331 2,493,190-2,493,201) (Supplementary Figure 10).

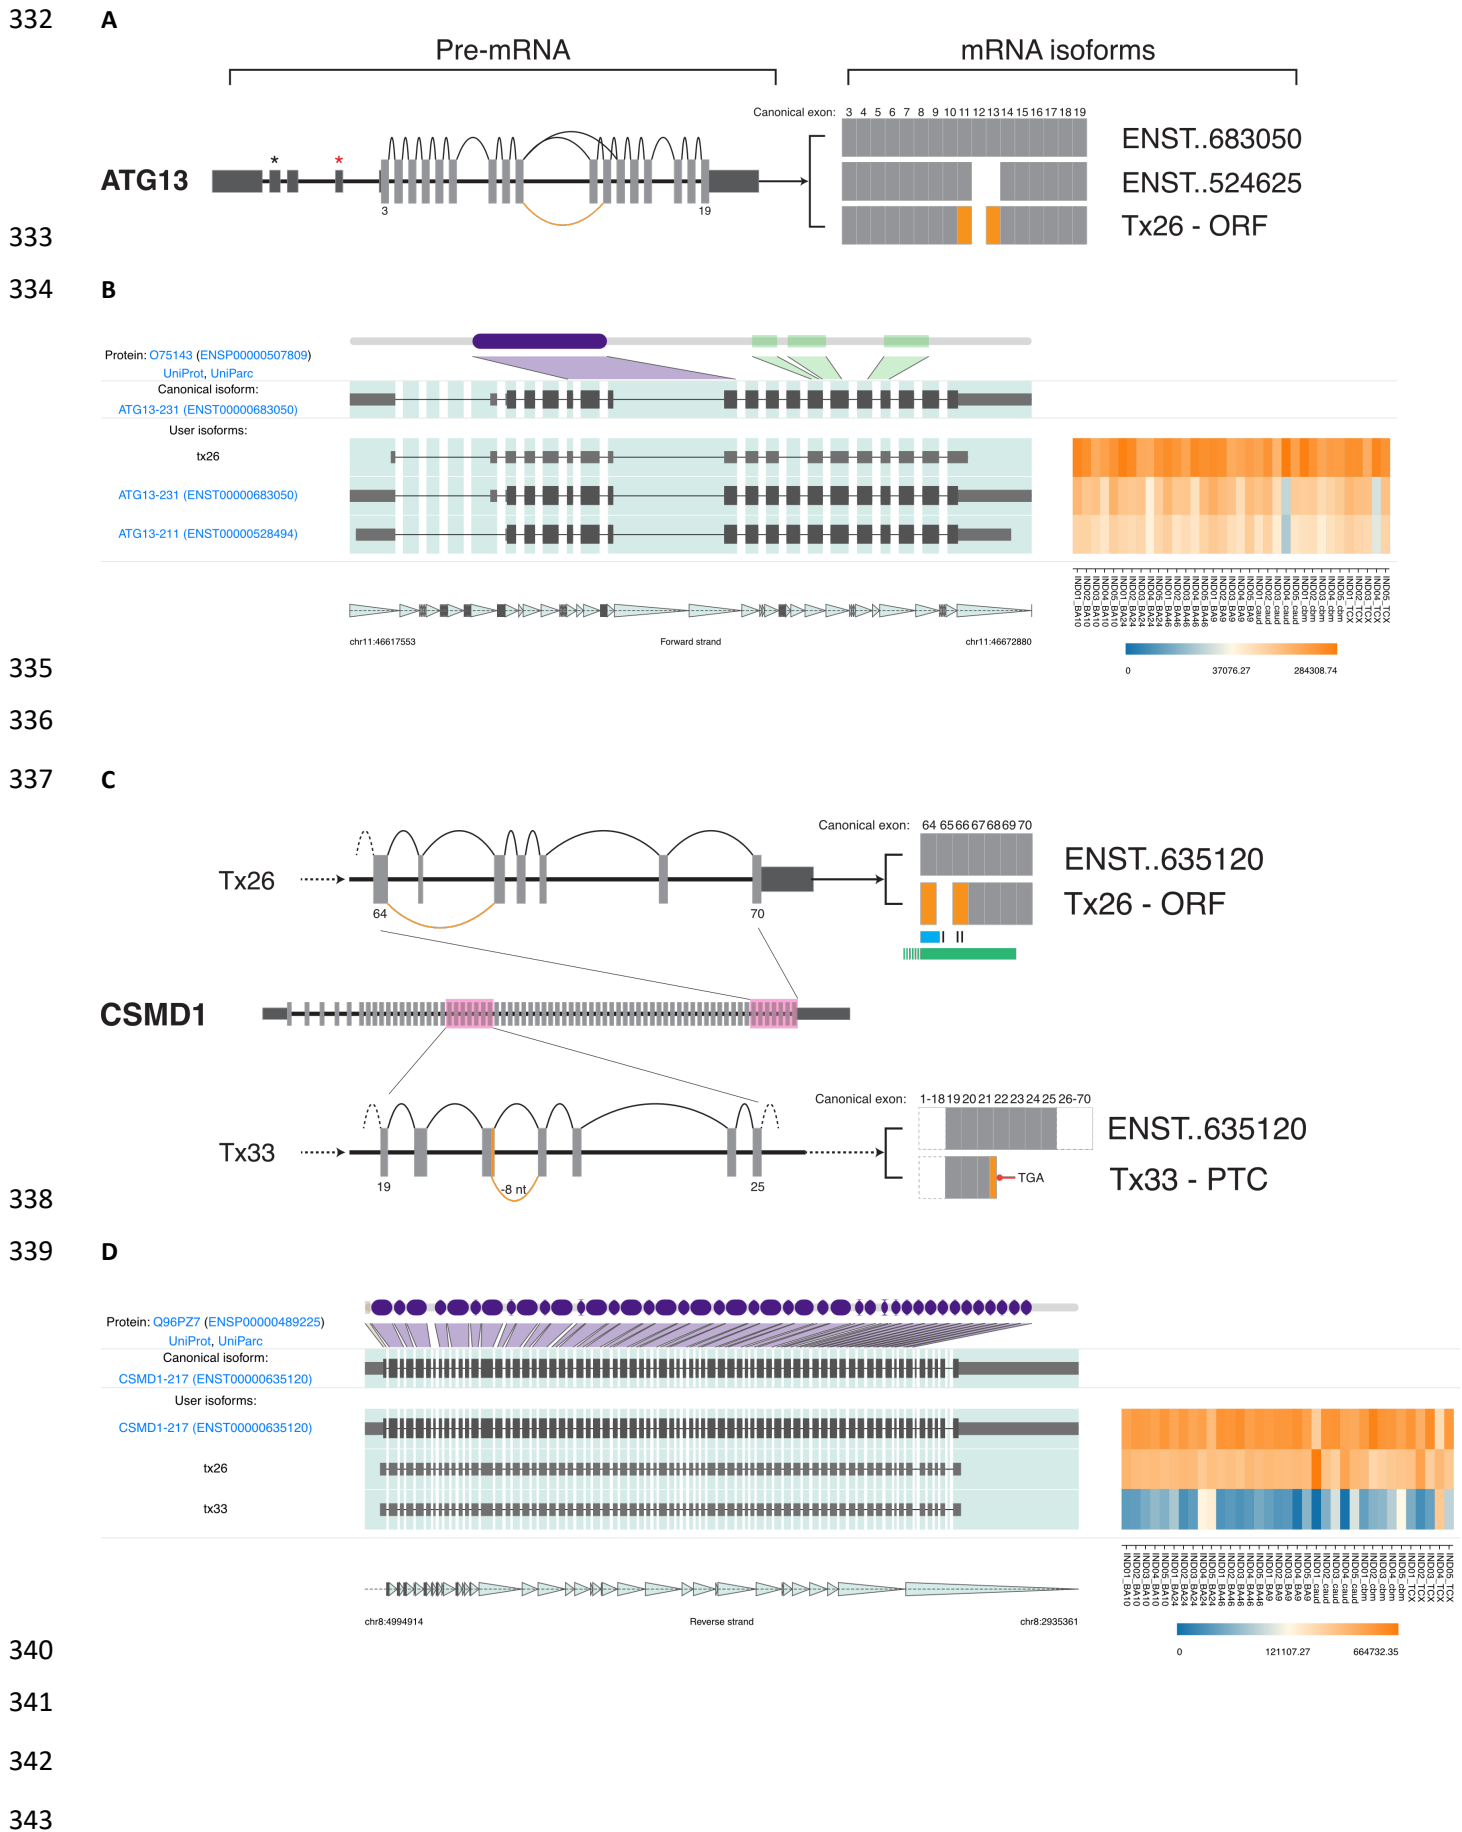

344 E

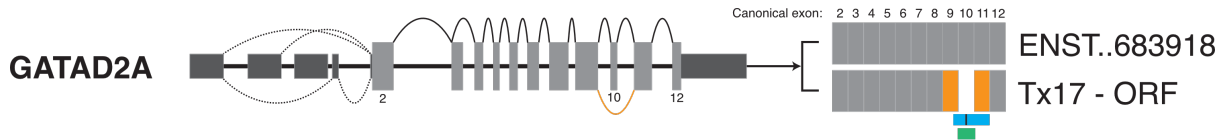

345

346 **Figure 5. Highly abundant novel isoforms and the predicted mRNA outcome. (A,C,E)** mRNA splice graphs.  
347 Dark and light grey boxes indicate 5' and 3' UTR and coding exons respectively. Numbers indicate the coding  
348 exon of interest. Orange arcs (pre-mRNA) and boxes (mRNA) indicate novel splicing events. mRNA isoforms  
349 depict known isoforms (ENST) against novel (Tx) isoforms, “..” indicates abbreviated zeroes. **(B,D)** IsoVis  
350 visualisation of isoform structures (centre stack) and expression levels (heatmap). Canonical isoform shown at  
351 top of stack including exonic mapping of protein domains (purple) and disordered regions (green) **A.** Splice  
352 graph of *ATG13* highlights the open reading frame (ORF) preserving skipping event of canonical exon 12. **B.**  
353 High expression of *ATG13* novel transcript 26 (Tx26). **C.** Splice graphs highlighting novel changes in *CSMD1*  
354 novel transcript 26 (Tx26) and 33 (Tx33) within highlighted pink regions. The ORF retaining skipping event of  
355 canonical exon 65 may disrupt a known glycosylation site (black bar), a sushi domain extending from exon 64  
356 (blue) and part of an extracellular domain (green). Tx33 contains a novel splice donor (-8 nt) within exon 21  
357 leading to a premature termination codon (PTC) in exon 22. Dashed lines indicate continuation of the  
358 transcript to 5' or 3' coding exons. **D.** Relatively high expression of *CSMD1* novel transcripts 26 and 33. **E.**  
359 *GATAD2A* novel transcript Tx17 contained a novel, ORF retaining, skipping event of canonical exon 10 which  
360 contains a phosphorylation site (black bar), part of a polar biased region (blue) and overlaps a CpG island (<300  
361 bp, green). Dashed lines indicate alternative splicing of 5' UTR exons.

362

### 363 **Novel isoforms alter predicted protein structures**

364 Novel isoforms have the potential to affect either post-transcriptional regulation and/or protein  
365 sequence, structure and function. We next investigated a selection of isoforms that would be predicted  
366 to lead to protein changes to understand their possible impact.

367 Several novel isoforms (including 5 of the top 20 by expression, Additional File 2R) predicted a novel  
368 exon 22 skipping event in the SZ and MDD risk gene *ITIH4*. Targeted mass spectrophotometry  
369 confirmed a novel junction between exons 21 and 23 (ETLFSVMPG//PVLPGGALGISSIR) created  
370 due to skipping of exon 22 (Figure 6A, Supplementary Figure 11). This event was predicted to encode  
371 a PTC <50 nt from the final exon junction, indicating it may not be directed to NMD. Protein  
372 structure prediction of the canonical (ENST00000266041.9) and a representative novel isoform  
373 (Tx71) indicated a loss of 106 aa (~44%) of the 35 kDa heavy chain domain but retention of three O-  
374 glycosylation sites (Thr:719, 720, 722) (Figure 6B-D). Novel transcript 71 accounted for ~3.7% of  
375 *ITIH4* TPM and this skipping event was found in an additional 24/68 (~35%) novel isoforms which  
376 together accounted for 23.4% of TPM. Tx71 also skipped canonical exons 15 and 16, which contain a  
377 protease susceptibility region (residues 633 - 713) and a MASP-1 cleavage site (645 - 646: RR) [44].  
378 Cleavage at this site and subsequent formation of an ITIH4-MASP complex can inhibit complement  
379 activation via the lectin pathway [44]. However, skipping of canonical exon 22 was not mutually  
380 inclusive with skipping of exons 15/16 as other novel isoforms with exon 22 skipping retained exons  
381 15/16. The absence of much of the 35 kDa heavy chain domain is likely to impact on ITIH4 protein  
382 function and further studies will be required to examine if it plays a role in neuronal phenotypes.

383 Ten novel isoforms were identified for the SZ risk gene glutamate metabotropic receptor 3 (*GRM3*).

384 Three novel isoforms (Txs 6, 7, 9) skip exon 2 which contains the canonical translation start site and

385 instead could use an alternative, frame retaining, translation initiation site in exon 1, extending the  
386 truncated reference isoform ENST00000454217.1 which is also supported by human amygdala  
387 mRNA (AK294178) (Additional File 2Q). Translation of these isoforms would likely cause  
388 significant disruption to the resultant protein with removal of the signal peptide, transmembrane  
389 domain and disulphide bonds. Cumulatively these novel isoforms accounted for a relatively low 8.8%  
390 of expression when compared to the canonical isoform (86.5%).

391 Both novel isoforms and exons were identified for the shared MDD and ASD risk gene neuronal  
392 growth regulator 1 (*NEGR1*). Most reads (83.5%) were assigned to the canonical *NEGR1* isoform  
393 (ENST00000357731, 354 aa). Three novel isoforms were identified, two of which (Tx1 and 2)  
394 contained novel exons (Figure 7A, B). These transcripts accounted for 9.4% (Tx2) and 5.1% (Tx1) of  
395 TPM. Both novel exons were located between cassette exons 6 - 7 and were validated using Sanger  
396 sequencing. The novel exon within Tx1 was 42 nt (14 aa) in length, had high 100 vertebrate  
397 conservation (UCSC) and was predicted to be frame retaining (Supplementary Figure 12A). Protein  
398 structure prediction of the 368 aa Tx1 using AlphaFold [45] showed a 14 aa extension near the C-  
399 terminal prior between the GPI anchor (G:324 aa) and the three immunoglobulin-like domains  
400 (Supplementary Figure 12B). In contrast, the 58 nt novel exon within Tx2 encoded a PTC (TAG) only  
401 35 nt distant to the final exon junction complex, suggesting it might not trigger NMD. Truncation of  
402 the protein at this position (313 + 7 novel aa) would remove the GPI anchor potentially creating a near  
403 complete protein (320 aa) that is unable to attach to the cell membrane (Supplementary Figure 12C).

404

#### 405 **Brain region specific expression of novel isoforms**

406 Many isoforms have brain region enriched or specific expression [46, 47]. Our amplicon sequencing  
407 approach identifies the presence and relative expression proportion of different isoforms. We next  
408 asked if any novel risk genes isoforms showed expression differences between brain regions. Overall,  
409 cerebellum exhibited most differences in isoform expression, consistent with previous whole  
410 transcriptome results [12].

411 Depression risk gene *DCC* netrin 1 receptor (*DCC*) novel isoform Tx9 had significantly higher TPM  
412 in cerebellum (Figure 8A, Additional File 2J). TPMs of Tx9 in CBM were approximately 10x higher  
413 than the average for cortical regions and 3x higher than in caudate. This isoform, classified as a COJ  
414 and predicted to encode a 1425 aa protein, accounted for ~5% of total *DCC* expression. Tx9 uses an  
415 alternative 3'SS (-60 nt) in cassette exon 17 and the skipped nucleotides cover an extracellular region  
416 and fibronectin type-III domain (UniProt). The SZ risk gene double C2 domain alpha (*DOC2A*) had  
417 two novel isoforms with significant variation in brain specific expression including Tx8 in cerebellum  
418 and Tx53 in caudate (Figure 8B, C, Additional File 2K). Novel Tx8 used a novel splice donor in  
419 canonical 5'UTR exon 1 (GT, +158 nt) and was predicted to encode a 400 aa protein unchanged from  
420 the canonical transcript. Tx53 was the only novel transcript that showed moderate but specific  
421 expression in caudate samples or any tissue other than cerebellum. Tx53 extends the known isoform  
422 ENST00000574405 to the canonical stop and is predicted to encode a 400 aa protein. Overall, 28  
423 novel isoforms in 11 risk genes were found to have variable expression amongst brain tissues  
424 supporting a role for these isoforms within specific brain regions or potentially in a subset of cells.

425

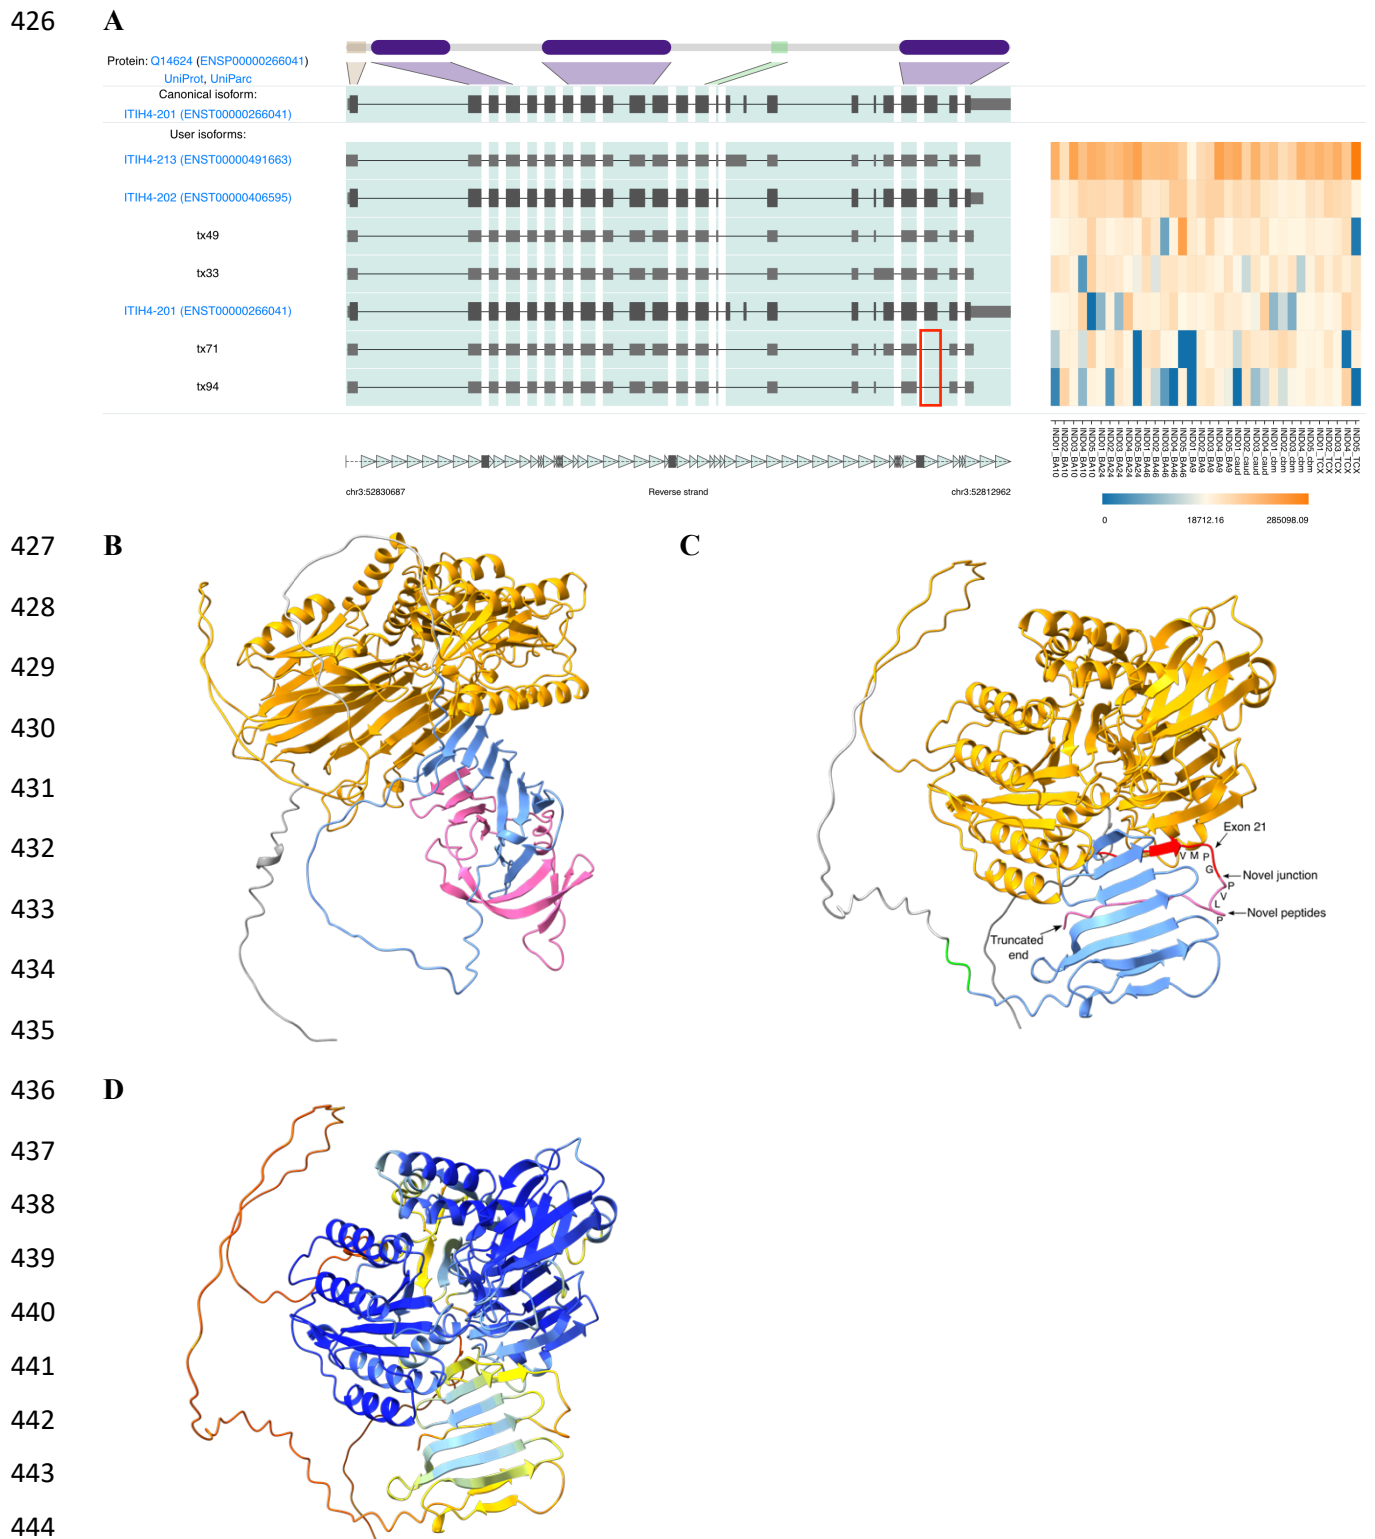

445 **Figure 6. *ITIH4* canonical and novel isoform protein structure predictions. A.** IsoVis stack of the top seven  
446 *ITIH4* isoforms sorted by expression. Several novel isoforms contained the novel exon 22 skipping event (red  
447 red box) including Tx71 and 94. **B.** Canonical isoform (ENST00000266041, UniProt:Q14624) structure prediction  
448 indicating 70 kDa (orange) and 30 kDa (blue) chains **C.** Novel isoform (Tx71) structure prediction indicating 70  
449 kDa chain (orange), truncated 30 kDa chain (blue), O-glycosylation sites (green), novel splice junction peptide  
450 detected using mass spectrophotometry (red) and novel peptides (pink). Black arrow indicates termination <50  
451 nt from the final exon junction complex. **D.** AlphaFold per-residue confidence scores (pLDDT) (0-100) for *ITIH4*

452 novel transcript 71: very high (>90, blue), confident (90-70, light-blue), low (70>50, yellow) and very low (<50,  
453 orange).

#### 454 **Sequencing and validation of novel exons**

455 Our amplicon sequencing approach detected a total of 28 novel exons in 13 MHD risk genes. Using  
456 RT-PCR followed by Sanger sequencing we validated a set of 21/21 targeted novel exons (Table 1).  
457 The SZ risk gene chloride voltage-gated channel 3 (*CLCN3*) contained four novel exons within six  
458 novel isoforms, and an example of PCR validation is shown in Supplementary Figure 13A. Validated  
459 novel exon mean length was 99 nt, ranging from 41 nt (*CLCN3*) to 231 nt (*GRM3*). 16 (76%) of  
460 validated novel exons were classified as ‘poison exons’ as they encoded a PTC (Supplementary  
461 Figure 13B), although two of these poison exons, within *NEGR1* and *XRN2*, were <50 nt from the  
462 final exon junction and therefore may not undergo NMD. The novel exon contained within Tx3 for  
463 *XRN2* had the second highest isoform expression for the gene, following the canonical transcript  
464 (ENST0000037191), with 4.7% of TPM. If translated, this transcript would omit an omega-N-  
465 methylarginine modification site (ARG:946) within a disordered region at the C-terminus  
466 (Supplementary Figure 14, Additional File 2AE).

467 Three novel exons were in untranslated regions and two were predicted to retain the ORF, including  
468 the 42 nt exon in *NEGR1* mentioned previously and a 60 nt exon within *SORCS3*. *SORCS3* is a  
469 member of the VPS10 transmembrane protein family and assists with neuronal protein trafficking and  
470 sorting and a lack of *SORCS3* in the hippocampus in mice has been associated with impaired learning  
471 and fear memory in mice [48-50]. The novel exon in Tx1, encoding 20 aa  
472 (AMCGRAQWFTPVILALWETE), falls within the *SORCS3* luminal region (position:  
473 LYS:956/PRO:957) and did not appear to disrupt the transmembrane or cytoplasmic domains.  
474 Comparison of protein prediction models of the canonical (ENST00000369701.8) and novel isoform  
475 (Tx1) showed the addition of an unstructured loop with a partial alpha helix within the second  
476 polycystic kidney disease (PKD2) domain (Figure 8A-D), though the prediction confidence was low,  
477 so the structural impact on the PKD2 domain remains uncertain [51].

478



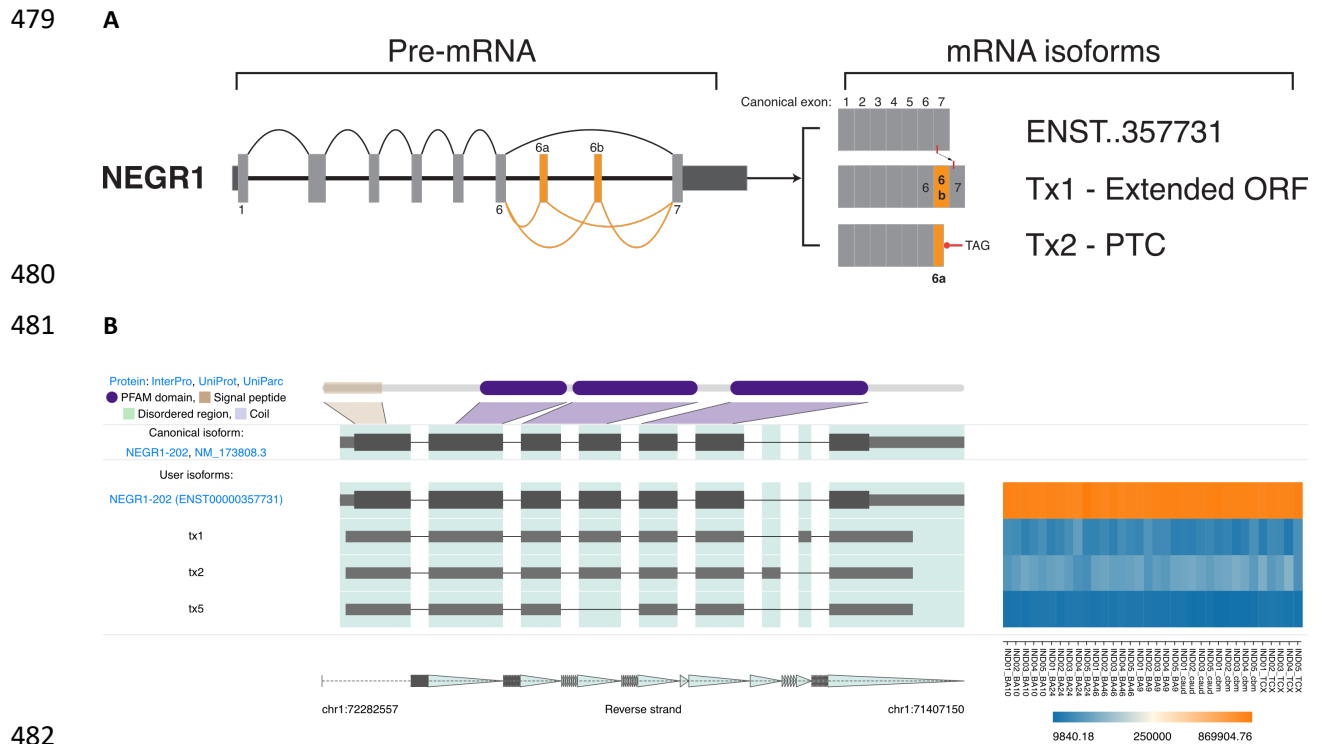

482

483

484 **Figure 7. *NEGR1* splice isoforms in human brain.** **A.** *NEGR1* mRNA splice graph highlighting validated novel  
 485 exons 6a and 6b. Dark and light grey boxes indicate 5' and 3' UTR and coding exons respectively. Numbers  
 486 indicate the coding exon of interest. Orange arcs (pre-mRNA) and boxes (mRNA) indicate novel splicing  
 487 events/exons. mRNA isoforms depict known isoforms (ENST) against novel (Tx) isoforms, “..” indicates  
 488 abbreviated zeroes. In the open reading frame (ORF) retaining Tx1, a GPI anchor (red line) is shown to shift 3'  
 489 in the final exon when compared to ENST00000357731. Tx2 encodes a premature termination codon (PTC)  
 490 within the novel exon. **B.** IsoVis visualisation of *NEGR1* isoform structures (centre stack) and expression levels  
 491 grouped by brain region (heatmap). Canonical isoform shown at top of stack including exonic mapping of a 5'  
 492 signal peptide (brown) and three immunoglobulin (Ig)-like domains (purple). Canonical 3'UTR has been  
 493 trimmed.

494 **A**

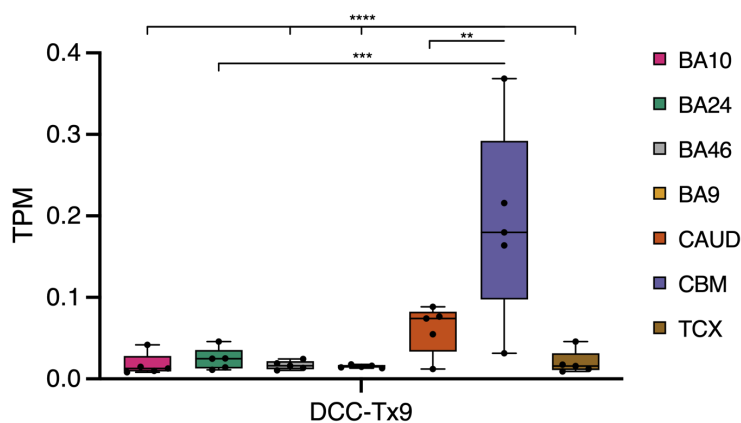

495

496 **B**

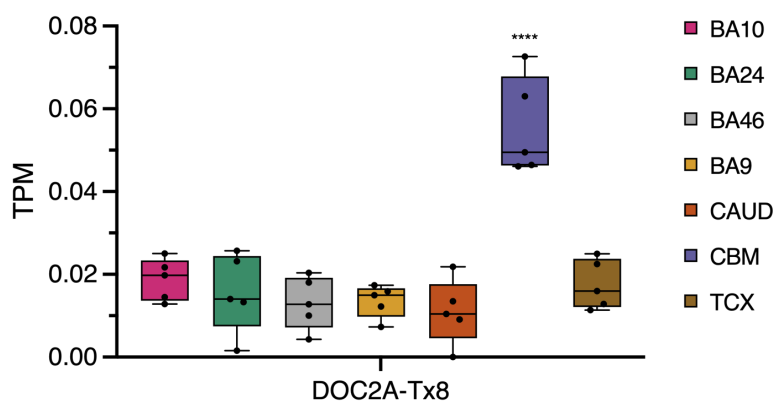

497

498 **C**

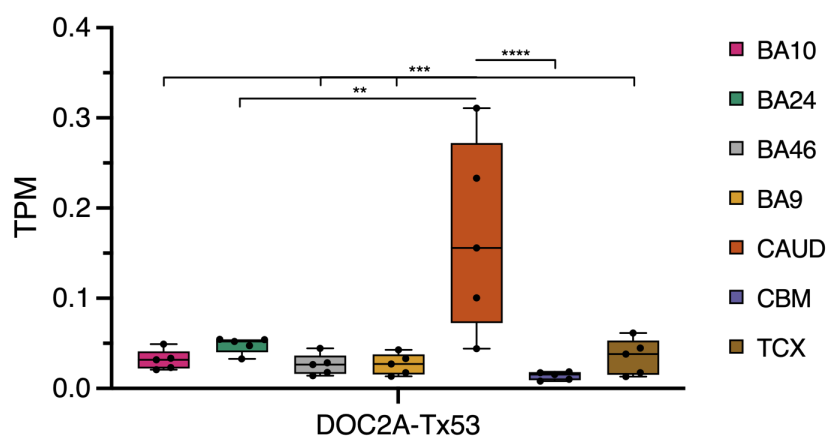

499

500 **Figure 8. Brain region specific expression of novel isoforms. A.** *DCC* novel transcript 9 (Tx9) uses a known  
 501 (ENST00000581580) alternative 3'SS (-60 nt) in cassette exon 17 and had significantly higher TPM in CBM.  
 502 ANOVA:  $F=9.098$ ,  $DF=28$ . **B-C.** *DOC2A* novel transcripts. Tx8 used a novel splice donor in canonical 5'UTR exon  
 503 1 (GT, +158 nt). ANOVA:  $F=20.73$ ,  $DF=28$ . Tx53 extended the known reference isoform ENST00000574405 to  
 504 the canonical translational stop and had significantly higher TPM in caudate. ANOVA:  $F=8.261$ ,  $DF=28$ .  
 505 Brodmann's Area (BA), caudate (CAUD), cerebellum (CBM) and temporal cortex (TCX). Ordinary one-way  
 506 ANOVA Tukey's multiple comparison adjusted P value: \*\*=  $P \leq 0.01$ , \*\*\*= $P \leq 0.001$ , \*\*\*\*= $P \leq 0.0001$ .

**Table 1.** Neuropsychiatric disorder risk gene novel exon validation.

*Definitions:* chromosome (Chr), nucleotide (nt), open reading frame (ORF), premature termination codon (PTC), untranslated region (UTR).

| Gene           | Novel exon | Chr | Genomic coordinates |           | Size (nt) | Classification | UniProt/Pfam domain  |
|----------------|------------|-----|---------------------|-----------|-----------|----------------|----------------------|
|                |            |     | Start               | End       |           |                |                      |
| <i>SORCS3</i>  | 20a        | 10  | 105244778           | 105244837 | 60        | ORF            | Luminal              |
| <i>GRIA1</i>   | 2a         | 5   | 153509750           | 153509806 | 57        | PTC            | Extracellular        |
| <i>XRN2</i>    | 16a        | 20  | 21345834            | 21345887  | 54        | PTC            | None                 |
| <i>XRN2</i>    | 29a        | 20  | 21387308            | 21387371  | 64        | PTC (<50nt)    | Disordered           |
| <i>SLC30A9</i> | 6a         | 4   | 42028140            | 42028260  | 121       | PTC            | Helix                |
| <i>SLC30A9</i> | 9a         | 4   | 42059964            | 42060036  | 73        | PTC            | Cation efflux family |
| <i>GRM3</i>    | 2a         | 7   | 86776784            | 86777014  | 231       | PTC            | None                 |
| <i>GRM3</i>    | 3a         | 7   | 86832296            | 86832411  | 116       | PTC            | None                 |
| <i>NEGR1</i>   | 6a         | 1   | 71532866            | 71532907  | 42        | ORF            | None                 |
| <i>NEGR1</i>   | 6b         | 1   | 71587343            | 71587400  | 58        | PTC (<50nt)    | Transmembrane        |
| <i>RFTN2</i>   | 1a         | 2   | 197654257           | 197654391 | 135       | PTC            | None                 |
| <i>RFTN2</i>   | 1b         | 2   | 197671542           | 197671664 | 123       | PTC            | None                 |
| <i>RFTN2</i>   | 6a         | 2   | 197616952           | 197617073 | 122       | PTC            | None                 |
| <i>CNTN4</i>   | 1a         | 3   | 2656485             | 2656587   | 103       | PTC            | None                 |
| <i>PTK2B</i>   | 3a         | 8   | 27318676            | 27318793  | 118       | UTR            | None                 |
| <i>PTK2B</i>   | 3a (short) | 8   | 27318696            | 27318793  | 98        | UTR            | None                 |
| <i>PTK2B</i>   | 3b         | 8   | 27319918            | 27319985  | 68        | UTR            | None                 |
| <i>CLCN3</i>   | 1a         | 4   | 169630165           | 169630335 | 171       | UTR            | None                 |
| <i>CLCN3</i>   | 2a         | 4   | 169638597           | 169638742 | 146       | PTC            | Cytoplasmic          |
| <i>CLCN3</i>   | 2b         | 4   | 169640168           | 169640208 | 41        | PTC            | Cytoplasmic          |
| <i>CLCN3</i>   | 2c         | 4   | 169663527           | 169663617 | 91        | PTC            | Cytoplasmic          |

507

## 508 Discussion

509 In this study we used long-read sequencing to profile 31 neuropsychiatric disorder risk genes  
510 identifying 363 novel RNA isoforms. We also present a new bioinformatic tool, IsoLamp, that can  
511 accurately identify and quantify novel RNA isoforms from long-read amplicon data. The recent  
512 proliferation of GWAS studies examining increasingly large population-wide data has identified  
513 hundreds of genomic variants associated with risk of developing a mental health disorder [23, 52].  
514 Evidence suggests that some risk variants, specifically those that are non-coding, play a role in pre-  
515 mRNA splicing and our current understanding of the transcriptomic profile for these risk genes is  
516 limited [35, 53]. A key finding of our research is both the high number of novel expressed RNA  
517 isoforms and, for some risk genes, the high expression of novel isoforms both individually and  
518 collectively. This finding reflects both the known complexity of alternative splicing in the human  
519 brain [54] and the current incompleteness of the reference transcriptome. As a result of the relatively  
520 deep sequencing afforded by this long-read approach, we have shown that there is a much higher level  
521 of RNA isoform diversity for these genes than reported in the current reference annotations. These  
522 findings provide new insight into the repertoire of RNA isoforms expressed in brain that could be  
523 important for understanding the risk and onset of neuropsychiatric disorders.

### 524 RNA isoform discovery, classification and visualisation

525 We generated a set of high-confidence RNA isoforms from nanopore long-read data using IsoLamp.  
526 IsoLamp optimises and streamlines transcript identification, quantification and annotation from long-  
527 read amplicon data and outperformed other methods. IsoLamp improves upon our previously  
528 published pipeline TAQLoRe [35] by expanding analysis capabilities to any gene and identifying all  
529 isoforms within a single pipeline. Our overall approach also overcomes the significant challenge of re-  
530 assembling and classifying RNA isoforms using short reads [55-57]. The primary outputs from  
531 IsoLamp, filtered transcripts (GTF) and transcript expression (TPM) is designed to be compatible  
532 with multiple downstream tools, including our visualisation tool IsoVis (<https://isomix.org/isovis>)  
533 (Wan et al., 2024, *under review*).

534 Taken together, our benchmarking results highlight that IsoLamp's optimised isoform discovery  
535 parameters, coupled with its specific filters (expression, overlapping primers, and full-length reads),  
536 yield significant improvements in both precision and recall compared to Bambu, FLAIR, FLAMES  
537 and StringTie2. The TPM filter applied to the data presented in this study is conservative and for long  
538 and complex genes may need to be tested to yield a balance of novel isoform detection and acceptable  
539 expression levels. IsoLamp also output consistent expression quantification that was robust to the  
540 quality of the annotations provided.

### 541 Novel RNA isoforms in neuropsychiatric disorders

542 The results presented in this study confirm our current limited understanding of RNA isoform profiles  
543 in the human brain and demonstrates how long-read sequencing is a powerful tool to address this  
544 issue [34, 35, 58].

545 We identified several highly abundant novel isoforms, including one, *ATG13* (Tx26), that was the  
546 most abundant gene isoform. *ATG13* forms part of a protein complex, including ULK1 and FIP200,  
547 that is critical for autophagy [59]. In our samples, transcript 26 had the highest TPM and contained a  
548 known skipping event of canonical (ENST000006683050) exon 12 which may be involved with  
549 FIP200 binding and subsequent function of ATG13 [60]. Where Tx26 and several other novel  
550 isoforms differ from known (e.g. ENST00000359513) isoforms is in the 5'UTR, indicating this region  
551 may play a role in translation regulation [61]. Similarly, the SZ risk gene *CSMD1*, had relatively high

552 expression of novel isoforms. Recent evidence suggests enrichment of *CSMD1* protein in the brain  
553 and activity as an inhibitor of the complement pathway in neurons [62]. Baum *et al.* (2024) show that  
554 *CSMD1* localises to synapses and that loss of *CSMD1* can lead to increased complement deposition  
555 potentially disrupting complement associated synaptic pruning. The novel isoforms identified in our  
556 samples provide transcriptional pathways through which *CSMD1* may be altered, potentially reducing  
557 expression or function of the protein, for example through incorporation of a premature termination  
558 codon (Tx33). Evidence from Alzheimer's disease studies has also linked increased complement  
559 pathway activity to cognitive impairment, however further studies, particularly in human models of  
560 neuronal development will be needed to link *CSMD1* transcriptional variability to SZ risk and severity  
561 [62, 63]. *KLC1* encodes one of the two light chains required for the microtubule motor protein  
562 kinesin, mutations in which have previously been found in SZ patients and which resulted in a SZ-like  
563 phenotype in mice [64]. Novel *KLC1* Tx1 (~31% TPM) was predicted to alter the C-terminal end of  
564 the protein, an area known to undergo alternative splicing to expand cargo binding diversity [65]. The  
565 combination of an altered C-terminal tetratricopeptide repeat (TPR), 3'UTR and relatively high  
566 expression suggests novel Tx1 plays a role in brain, though the functional impact on the protein  
567 requires further validation.

568 Several novel isoforms and exons were identified for the ion homeostasis and channel genes *CLCN3*,  
569 *CACNA1C* and *SLC30A9* which have shared risk for SZ, BPD and ASD [21, 23, 52]. Voltage-gated  
570 ion channels are widely distributed in the brain and regulate neuronal firing. Mutations to these genes  
571 have been associated with disease and the emerging role of these channels in neuropsychiatric  
572 disorders has been previously reviewed [66]. *CLCN3* belongs to the CLC family of anion channels  
573 and transporters and has an established role in human neurodevelopment [67, 68]. We identified and  
574 validated four novel exons in *CLCN3*, three of which were predicted to encode a PTC which could  
575 lead to NMD. The fourth was located within the 5'UTR, an area known to impact translation  
576 regulation in humans potentially through structural interference with the ribosome [61]. Splice  
577 variants of *CLCN3* have been shown to impact intracellular localisation and our results identified  
578 additional splice variants, in particular a novel RNA isoform (Tx9) which is similar to  
579 ENST0000613795, but includes a 76 bp exon 12 [67]. Twenty-two novel isoforms were identified for  
580 calcium channel gene *CACNA1C* and supporting previous findings [35] the top ten novel isoforms, by  
581 TPM, were classified as frame retaining, supporting their potential to generate functional proteins.  
582 *SLC30A9* (first known as *HUEL*) encodes the zinc transporter protein 9 (ZnT9), which is involved in  
583 zinc transport and homeostasis in the endoplasmic reticulum [69]. Whilst the function of the protein is  
584 not fully understood, a 3 nt familial deletion (c.1047\_1049delGCA) in the highly conserved cation  
585 efflux domain (CED) has been recorded to result in changes to protein structure, intracellular zinc  
586 levels and intellectual disability [70, 71]. Critically, we identified and validated a novel exon (Tx3-  
587 9a:73 nt) within this CED providing evidence that this region may be alternatively spliced more  
588 commonly than previously understood, potentially impacting protein function [69].

589 Finally, using mass spectrophotometry we confirmed a novel skipping event in the *ITIH4* protein,  
590 indicating the utility of combining long-read sequencing with proteomics. *ITIH4* is an acute-phase  
591 protein the serum levels of which have been associated with MDD and is thought to be involved in  
592 neuro-inflammation [72, 73]. Despite several studies outlining an association for *ITIH4* and risk for  
593 SZ, BPD or MDD onset, the causal mechanisms for this gene remain elusive and a further study is  
594 required to further explore the impact of the coding change detected in our study.

## 595 **Limitations and future directions**

596 Long-read amplicon sequencing, while providing an extremely sensitive isoform quantification  
597 method, is limited by the set(s) of primers used to amplify each risk gene. Our method aimed to locate  
598 primers within the 5' and 3' UTRs in proximity to the canonical translational start and stop codons.  
599 This approach generally amplified the entire coding sequence but does not capture full-length  
600 isoforms or variation in the UTRs and additional primers must be made to capture alternative unique  
601 start and termination sites. When using this method users must interpret the reported novel isoform  
602 proportions in the context of the known isoforms targeted e.g. if the canonical isoform is not a target  
603 of the primer pair, novel isoform expression may appear inflated.

604 The results of our study are limited by the sample size of available control post-mortem brain tissue.  
605 The nanopore long-read data for each risk gene was generated from five elderly, male control  
606 individuals, with a single female sample removed from further analyses due to quality constraints.  
607 The small number of available individuals means this dataset was not powered to investigate genotype  
608 impacts on isoform expression, though this will be an important area of investigation to determine  
609 which risk genotypes act through changes in isoform structure and/or expression.

610 Sample and RNA quality, as measured by RINe, is critical to high-quality sequencing and this is  
611 especially true for long reads [35, 74]. Supporting previous findings in mRNA, our data suggest that  
612 pH values <6.3 impacted the quality of post-mortem human brain RNA, which is especially critical  
613 for robust amplification of longer (>5 Kb) CDS [75]. In general, PCR cycling was kept as low as  
614 possible to avoid PCR bias towards shorter isoforms and other artifacts. However, we noted that lower  
615 RINs, as recorded for Ind04, appeared to impact amplicons of longer CDS. To help overcome such  
616 issues, future long-read amplicon sequencing could incorporate unique molecular identifiers to tag  
617 molecules prior to PCR to ensure an accurate representation of the original RNA isoforms [76].

618 The risk genes profiled in this study were selected based on multiple levels of evidence for their  
619 involvement in risk, not only from GWAS but from meta-analyses and further independent studies  
620 [22, 25]. Whilst this approach was expected to produce a set of genes with high-confidence of their  
621 involvement in disorder risk, it is not exhaustive and it will be important to ensure risk gene lists are  
622 updated as more evidence from GWAS and other studies becomes available [25, 53]. Genes that are  
623 thought to confer resistance to the development of neuropsychiatric disease are also beginning to  
624 emerge and the addition investigation of their expression and isoform profiles may also provide  
625 valuable insight into disease risk and progression [77]. In future, combining whole or amplicon  
626 transcriptomic data, large-scale proteomic data and machine-learning predictive models like TRIFID  
627 can help to identify and prioritise functional proteomic isoforms [78].

## 628 **Conclusion**

629 In conclusion, we identified hundreds of unreported RNA isoforms and novel exons, many of which  
630 could impact the function of known neuropsychiatric risk genes that also play crucial roles in normal  
631 neuronal development and activity. An understanding of the regulatory and functional impacts of  
632 these novel isoforms and incorporating long-read Nanopore data into existing repositories will help  
633 form an important knowledge base of alternative splicing in the human brain [79, 80]. Some novel  
634 isoforms or exons may also be future therapeutic targets through the modulation of splice isoforms  
635 using antisense oligonucleotides or CRISPR technology.

## 636 **Methods**

### 637 **Sample preparation and QC**

638 Healthy control post-mortem human brain samples were obtained from six individuals collected  
639 through the Victorian Brain Bank (VBB) under HREC approvals #12457 and #28304. Age, sex and  
640 additional details including the post-mortem interval (PMI), pH and tissue weight are shown in  
641 Supplementary Table 1. Briefly, samples comprised 5 males and 1 female, age range: 51 – 72 yrs,  
642 PMI range: 31 – 64 hrs and pH range: 5.7 – 6.7. Due to low RNA integrity number equivalent (RINe)  
643 the female control was removed from further analysis. Frozen tissue (weight range: 57 – 135 mg) was  
644 cut from seven brain regions including Brodmann areas (BA), BA9 (dorsolateral prefrontal cortex  
645 (DLPFC)), BA46 (medial prefrontal cortex (MPFC)), BA10 (fronto-parietal cortex (FPC)), Brodmann  
646 Area 24 (dorsal anterior cingulate cortex (dACC)), caudate, cerebellum and temporal cortex. Total  
647 RNA was extracted from bulk tissue in eight randomised batches of 3 – 6 samples. First, frozen brain  
648 tissue was homogenised on ice, using a manual tissue grinder (Potter-Elvehjem, PTFE), whilst  
649 immersed in 1 mL QIAzol Lysis Reagent (QIAGEN). Lysate was then processed using a RNeasy  
650 Lipid Tissue Kit (QIAGEN, 74804), according to the manufacturers' instructions. Isolated RNA  
651 quality and quantity was checked using a Qubit 4 Fluorometer (2 µL), TapeStation 4200 (RINe: cut-  
652 off = 6) and Nanodrop 2000.

### 653 **Database curation and risk gene selection**

654 MHD risk genes were selected for long-read amplicon sequencing using an internal database that  
655 aimed to collate evidence from the literature of gene involvement in disease risk from the original  
656 GWAS, meta-analyses including MAGMA (and variants including eMAGMA, hMAGMA,  
657 nMAGMA), TWAS, SMR and follow-up studies including fine mapping, protein-protein interaction  
658 (PPI), epigenetic (DNA methylation) and targeted experimental validation (Supplementary Figure 1).  
659 The foundation of this database was a list of significant GWAS SNPs for SZ, BD, MDD and ASD.  
660 Association data was downloaded from the NHGRI-EBI GWAS Catalog [81]. MHD GWAS  
661 associations were filtered on the 'Disease/Trait' column to exclude effects of treatments including  
662 pharmaceutical, mixed disorder studies and associations with behavioural traits like smoking or  
663 alcohol intake. Associations were excluded if both the 'reported gene' column was 'not reported  
664 (NR)' and the 'mapped gene' column was blank. Date data was downloaded, filters applied, and  
665 percentage associations retained are detailed in Supplementary Table 4.

666 Follow-up studies and experiments were then identified in the literature and the reported genes were  
667 manually collated and assigned to an 'evidence' category (i.e.: MAGMA, SMR, experimental  
668 validation etc). Each evidence category had the following information headers including the PubMed  
669 ID of the reporting manuscript, the first author and the reported SNP and gene. An R script was used  
670 to curate risk genes and appearances in unique studies. Counts of reported risk genes and unique  
671 studies, for each evidence category, were then combined with the original GWAS table. Risk genes  
672 were then sorted by evidence (high to low), separately for each MHD. A multi-trait evidence list was  
673 also made by combining each MHD table together and again sorting by descending evidence. This  
674 gave us flexibility to focus on risk genes that appeared to be specific to a single MHD or those with  
675 shared risk across disorders.

### 676 **Primer design, cDNA synthesis and long-range PCR**

677 Thirty-one (31) MHD risk genes were selected from our database and the full coding sequence (CDS)  
678 from the canonical isoform was downloaded from the UCSC Genome Browser [82]. Primers, located  
679 in the 5' and 3' UTRs, were designed to amplify the CDS using Primer3 Plus [83]. Additional primers

680 were made to amplify alternative start or end sites that were not captured by a single primer pair.  
681 Additional UCSC track sources including expressed sequence tags (EST), transcript support level  
682 (TSL), APPRIS designation, human mRNA support, cap-analysis of gene expression (CAGE) peaks,  
683 CpG islands and H3K4Me3 marks were examined to ensure there was enough evidence that  
684 alternative start or end sites were real before a primer was designed [82]. All primers, primer  
685 combinations and modified Primer3 Plus settings are listed in Supplementary Table 3. Risk gene  
686 primers from Primer3 Plus were aligned to tracks on the UCSC Genome Browser using BLAT for  
687 visualisation and tested using the In-Silico PCR [82].

688 To amplify risk gene CDS, 1 µg of total RNA was used as template for cDNA synthesis using  
689 Maxima H Minus Reverse Transcriptase (Thermo Fisher Scientific, EP0752, 200 U/µL) according to  
690 the manufacturers' instructions. Two duplicate cDNA plates were generated simultaneously to reduce  
691 variability and provide enough template for multiple risk gene PCRs. Risk genes were amplified using  
692 one of following DNA polymerases; LongAmp® Taq 2X Master Mix (NEB, M0287S), Platinum™  
693 SuperFi II PCR Master Mix (Thermo Fisher Scientific, 12368010) or PrimeSTAR GXL (TakaraBio,  
694 R050B). Each set of gene primers were individually optimised by adjusting PCR cycling conditions  
695 (Supplementary Table 3) until sufficient pure template (~1 – 10 ng) could be produced for input to  
696 barcoding. Short-fragments and primer-dimer were removed prior to barcoding using AMPure XP  
697 beads (Beckmann Coulter) at 0.5 – 0.8x ratios. An overview of the experimental protocol is shown in  
698 Figure 1A.

### 699 **Long-read amplicon sequencing**

700 Barcoding conditions for sample multiplexing (N=35, EXP-PBC096, ONT) and library preparation  
701 for long-read sequencing followed the recommended ligation sequencing protocol (Figure 1A) (SQK-  
702 LSK109/110, ONT). All barcoding PCR was done using LongAmp® Taq 2X Master Mix with an  
703 amplicon specific extension time (approximately 1 min/Kb) and 10 – 15x cycles. AMPure clean-up  
704 following adaptor ligation was adjusted from the default ratio of 0.4X depending on the length of the  
705 target amplicon. Adaptor ligated libraries were loaded (25 – 35 fmol) onto MinION (FLO-MIN106)  
706 flow cells and a minimum of 10,000 reads per sample were targeted before flushing and storing the  
707 flow cell. All runs were re-basecalled using the super-accurate (SUP) basecalling model (Guppy  
708 v6.0.17, 2022) and minimum qscore = 10.

### 709 **Isoform discovery from long-read amplicon sequencing with IsoLamp**

710 We developed a new bioinformatic pipeline, IsoLamp, for the analysis of long-read amplicon data  
711 (Figure 1B). First, pass reads were down sampled [84] to a consistent number (8000) per barcode and  
712 mapped to the reference genome with minimap2 (v2.24) [37]. Then, low accuracy reads (≥5% error  
713 rate) were removed and samples were merged prior to isoform identification. Read accuracy was  
714 calculated using CIGAR strings in the BAM files and is defined as: ('X'+ '='+'I'+ 'D'-  
715 'NM')/('X'+ '='+'I'+ 'D'). Next, the merged BAM file of high accuracy reads was used as input for  
716 isoform discovery with Bambu (v3.2.4) using the following parameters: novel discovery rate (NDR) =  
717 1 and min.fractionByGene = 0.001 [38]. Next, isoforms identified with Bambu were filtered to  
718 remove any with zero expression and to retain only isoforms overlapping the known primer  
719 coordinates using bedtools intersect (v2.30) [85]. Finally, the remaining isoforms were used to create  
720 an updated transcriptome with GffRead (v0.12.7) [86], and reads from each barcode were quantified  
721 with salmon in alignment-based mode (v0.14.1) [87] and isoforms were annotated with GffCompare  
722 (v0.12.6) [86]. The pipeline outputs a list of isoform annotations (.gtf), isoform expression as  
723 transcripts per million (TPM) and proportion of overall gene expression, as well as a report  
724 summarising the results. An optional TPM filter was also applied to further filter isoforms which



725 required a minimum TPM of 5000. If the user specifies a grouping variable for their input samples, a  
726 t-test is performed between isoform proportions between groups and a false discovery rate of 0.05 is  
727 applied.

728 We benchmarked the performance of the IsoLamp pipeline using Spike-in RNA Variant (SIRV) Set 1  
729 synthetic RNA controls (Lexogen). SIRV isoforms are present in three mixes (E0, E1, E2) that  
730 contain isoforms in varying known concentrations. Primers were designed to amplify from the first to  
731 the last exon (as described above) of SIRV5 and SIRV6 genes from cDNA generated in triplicate  
732 from each SIRV mix (N=27) (Supplementary Figure 2). PCR amplification conditions for SIRV  
733 amplicons are shown in Supplementary Table 5. Samples were barcoded and sequenced as described  
734 above, and subsequent basecalling and demultiplexing was performed with Guppy (v6.0.17, SUP,  
735 2022). The IsoLamp pipeline was compared against four other isoform discovery tools: StringTie2  
736 [41], FLAIR [39], FLAMES [40] and Bambu [38] (using both default parameters and the optimised  
737 parameters used in IsoLamp). The sensitivity, specificity, accuracy and correlations (expected versus  
738 observed counts) of the programs were compared using three SIRV reference annotations: complete  
739 (C), incomplete (I) (missing isoforms, to test ability to recover unannotated true positive isoforms)  
740 and over (O) (extra isoforms, to test ability to minimise false positive annotated isoforms). Novel  
741 isoforms were categorised using SQANTI (v4.2) against the human reference (GENCODE release 41,  
742 GRCh38.p13). Finally, a combined dataset of expression values for each known and novel isoform  
743 and its associated metadata including brain region, gene, RINe, pH, individual, PMI and age was  
744 analysed using principal component analysis (PCA).

#### 745 **Novel exon validation**

746 Nanopore long-read supported novel exons were validated by RT-PCR. Amplicons were designed  
747 from the known 5' flanking exon into the novel exon and from the novel exon into the known 3'  
748 flanking exon. An amplicon spanning the known 5' and 3' flanking exons was used as a positive  
749 control. Primers were designed using Primer3 [83] and checked using Primer BLAST [88] and are  
750 listed in Supplementary Table 6. In some cases, the primer design space was restricted by the novel  
751 exon sequence length and/or nucleotide composition. Novel exons were amplified using *Taq* 2X  
752 MasterMix (NEB, M0270L) and cycling conditions can be found in Supplementary Table 6. PCR  
753 products were visualised via gel electrophoresis using GelGreen® Nucleic Acid Stain (Biotium,  
754 41005) and GeneRuler 100 bp ladder (TFS, SMN0243). PCR products in the expected size range were  
755 cleaned up using AMPure XP Reagent (Beckmann Coulter, A63881) at a 1.8X ratio to remove  
756 fragments <100 bp and sent for Sanger sequencing (100 – 200 bp, AGRF).

#### 757 **Protein isolation and novel sequence detection using targeted mass spectrometry (MS)**

758 Post-mortem frontal cortex and cerebellum brain samples (mean weight = 53.25 mg) were used for  
759 protein isolation. Samples were from a 59 yo female and 74 yo male, with PMIs of 30 and 22 hrs  
760 respectively, who had no known neurological or neuropsychiatric conditions. Samples were lysed in  
761 500 µL of guanidinium-HCl buffer using tip-probe sonication, heated briefly to 95 °C and diluted 1:1  
762 with LC-MS water before 4 mL of ice-cold acetone was added to precipitate protein overnight at -30  
763 °C. Following a wash (3 mL 80% cold acetone) and incubation (-30 °C, 1 hr) supernatant was  
764 discarded and protein air-dried (RT, 30 mins). The protein pellet was resuspended in 500 µL 10%  
765 TFE in 100 mM HEPES (pH 7.5) and sonicated. Protein concentration was estimated with BCA (1 µL  
766 sample + 9 µL 2% SDS). Normalised protein (10 µg/10 µL) was then digested using a combination of  
767 LysC/trypsin or GluC for all samples. Peptides were separated on a Dionex 3500 nanoHPLC, coupled  
768 to an Orbitrap Lumos mass spectrometer (Thermo Fisher Scientific) via electrospray ionization in  
769 positive mode with 1.9 kV at 275 °C and RF set to 30%. Separation was achieved on a 50 cm × 75

770  $\mu\text{m}$  column packed with C18AQ (1.9  $\mu\text{m}$ ; Dr Maisch, Ammerbuch, Germany) (PepSep, Marslev,  
771 Denmark) over 120 min at a flow rate of 300 nL/min. The peptides were eluted over a linear gradient  
772 of 3–40% Buffer B (Buffer A: 0.1% v/v formic acid; Buffer B: 80% v/v acetonitrile, 0.1% v/v FA)  
773 and the column was maintained at 50 °C. The instrument was operated in targeted M2 acquisition  
774 mode with an MS1 spectrum acquired over the mass range 300–1300 m/z (120,000 resolution, 100%  
775 automatic gain control (AGC) and 50 ms maximum injection time) followed by targeted MS/MS via  
776 HCD fragmentation with 0.7 m/z isolation (60,000 resolution, 200% AGC, 300 ms maximum  
777 injection time and stepped normalised collision energy 25, 30 and 35 eV). Data were analysed in  
778 Proteome Discover v2.5.0.400 with SequestHT [89] and searched against a custom .fasta database  
779 containing only risk gene predicted protein isoform sequences containing the targeted peptide  
780 sequences. Precursor mass tolerance was set to 10 ppm and fragment mass tolerance set to 0.02 Da.  
781 Data were filtered to 1% FDR at the peptide spectral match level only i.e. no protein level FDR, and  
782 MS/MS annotations were manually verified. Protein structure prediction was done using AlphaFold  
783 accessed through UCSF ChimeraX (v1.5) [45, 51, 90].

## 784 **Statistics**

785 Statistical results presented in this manuscript included linear regression to investigate RNA yield and  
786 quality (RIN) against individual, pH and PMI. Ordinary one-way ANOVAs using Tukey’s multiple  
787 comparison correction were used to analyse isoform TPMs between brain regions. Statistical tests and  
788 associated graphical output were performed using GraphPad Prism 10.1.0.

## 789 **Isoform data visualisation**

790 The publicly available web-tool IsoVis (v1.6, <https://isomix.org/isovis/>) was used to visualise RNA  
791 isoforms and associated expression data (Wan et al., 2024, *under review*). Known and novel RNA  
792 isoforms are represented as a stack to compare alternative splicing events between different isoforms.  
793 Read counts assigned to each RNA isoform for each of the 35 samples were visualised as a heatmap.

794

## 795 **Declarations**

### 796 **Ethics approval**

797 Healthy control post-mortem human brain samples were obtained from six consented individuals  
798 collected by the Victorian Brain Bank (VBB) and the Human Research Ethics Committee of the  
799 University of Melbourne gave ethical approval for this work: #12457 and #28304.

### 800 **Consent for publication**

801 The VBB obtained signed consent for whole-brain donation from either the donor or their next-of-kin  
802 in which the signed person states: “I agree that research data gathered from studies may be published  
803 providing the donor cannot be identified.” All samples mentioned in this study have been de-  
804 identified and, except VBB pathologist CM, authors were blinded to any other individual details  
805 beyond those mentioned in the methods.

### 806 **Availability of data and materials**

807 All raw nanopore long-read data (fastq) generated for each of the genes reported in this manuscript  
808 are available at The European Genome-Phenome Archive (EGA) study: EGAS00001007744. Gene  
809 isoform GTFs and TPM data from IsoLamp analysis are available upon request. Scripts used for risk  
810 gene evidence curation and downstream data analysis are available upon request. IsoLamp is open

811 source and freely available at <https://github.com/ClarkLaboratory/IsoLamp>. IsoVis is freely available  
812 at <https://isomix.org/isovis/>.

### 813 **Competing interests**

814 RDP, YP, YY, JG and MBC have received financial support from Oxford Nanopore Technologies  
815 (ONT) to present their findings at scientific conferences. ONT played no role in study design,  
816 execution, analysis or publication.

### 817 **Funding**

818 This work was supported by the Leichtung Family through the Brain and Behavior Foundation  
819 NARSAD Young Investigator Grant [27184 to MBC] and an Australian National Health and Medical  
820 Research Council Investigator Grant [GNT1196841 to MBC].

### 821 **Author contributions**

822 MBC conceived the study. SJ, YP and JG wrote the IsoLamp software with testing assistance from  
823 RDP, RA, AL, EMW, YS, RK. SJ, RC and RDP wrote the code to analyse and collate the risk gene  
824 database. CM performed pathology analysis and classified post-mortem brain tissues. RDP performed  
825 RNA extraction, long-read experiments and bioinformatic analysis with assistance from YP, YY, RA,  
826 AL, AH, EMW, YS and RK. MD and BLP extracted protein, ran mass spectrophotometry and  
827 analysed results. MBC and RDP oversaw the research. RDP and MBC wrote the paper with input and  
828 review from all authors.

### 829 **Acknowledgements**

830 The authors would like to acknowledge that brain tissues were received from the Victorian Brain  
831 Bank (VBB), supported by The Florey, The Alfred and the Victorian Institute of Forensic Medicine  
832 and funded in part by Parkinson's Victoria, MND Victoria and FightMND. The authors would also  
833 like to thank Geoff Pavey at the VBB for his assistance with frozen tissue preparation. This research  
834 was supported by The University of Melbourne's Research Computing Services and the Petascale  
835 Campus Initiative.

## 836 References

- 837 1. Pan Q, Shai O, Lee LJ, Frey BJ, Blencowe BJ: **Deep surveying of alternative splicing**  
838 **complexity in the human transcriptome by high-throughput sequencing.** *Nature genetics*  
839 2008, **40**:1413-1415.
- 840 2. Kelemen O, Convertini P, Zhang Z, Wen Y, Shen M, Falaleeva M, Stamm S: **Function of**  
841 **alternative splicing.** *Gene* 2013, **514**:1-30.
- 842 3. Nilsen TW, Graveley BR: **Expansion of the eukaryotic proteome by alternative splicing.**  
843 *Nature* 2010, **463**:457-463.
- 844 4. Leung SK, Jeffries AR, Castanho I, Jordan BT, Moore K, Davies JP, Dempster EL, Bray NJ,  
845 O'Neill P, Tseng E: **Full-length transcript sequencing of human and mouse cerebral cortex**  
846 **identifies widespread isoform diversity and alternative splicing.** *Cell reports* 2021, **37**.
- 847 5. Mazin P, Xiong J, Liu X, Yan Z, Zhang X, Li M, He L, Somel M, Yuan Y, Phoebe Chen YP:  
848 **Widespread splicing changes in human brain development and aging.** *Molecular systems*  
849 *biology* 2013, **9**:633.
- 850 6. Baralle FE, Giudice J: **Alternative splicing as a regulator of development and tissue identity.**  
851 *Nature reviews Molecular cell biology* 2017, **18**:437-451.
- 852 7. De Paoli-Iseppi R, Gleeson J, Clark MB: **Isoform Age-Splice Isoform Profiling Using Long-**  
853 **Read Technologies.** *Frontiers in Molecular Biosciences* 2021, **8**.
- 854 8. Castaldi PJ, Abood A, Farber CR, Sheynkman GM: **Bridging the splicing gap in human**  
855 **genetics with long-read RNA sequencing: finding the protein isoform drivers of disease.**  
856 *Human Molecular Genetics* 2022, **31**:R123-R136.
- 857 9. Stanley RF, Abdel-Wahab O: **Dysregulation and therapeutic targeting of RNA splicing in**  
858 **cancer.** *Nature cancer* 2022, **3**:536-546.
- 859 10. Vitting-Seerup K, Sandelin A: **IsoformSwitchAnalyzeR: analysis of changes in genome-wide**  
860 **patterns of alternative splicing and its functional consequences.** *Bioinformatics* 2019,  
861 **35**:4469-4471.
- 862 11. Manuel JM, Guilloly N, Khatir I, Roucou X, Laurent B: **Re-evaluating the impact of alternative**  
863 **RNA splicing on proteomic diversity.** *Frontiers in Genetics* 2023, **14**:1089053.
- 864 12. Melé M, Ferreira PG, Reverter F, DeLuca DS, Monlong J, Sammeth M, Young TR, Goldmann  
865 JM, Pervouchine DD, Sullivan TJ: **The human transcriptome across tissues and individuals.**  
866 *Science* 2015, **348**:660-665.
- 867 13. Carvill GL, Engel KL, Ramamurthy A, Cochran JN, Roovers J, Stamberger H, Lim N, Schneider  
868 AL, Hollingsworth G, Holder DH: **Aberrant inclusion of a poison exon causes dravet**  
869 **syndrome and related SCN1A-associated genetic epilepsies.** *The American Journal of*  
870 *Human Genetics* 2018, **103**:1022-1029.
- 871 14. Lara-Pezzi E, Desco M, Gatto A, Gómez-Gaviro MV: **Neurogenesis: regulation by alternative**  
872 **splicing and related posttranscriptional processes.** *The Neuroscientist* 2017, **23**:466-477.
- 873 15. Rehm J, Shield KD: **Global Burden of Disease and the Impact of Mental and Addictive**  
874 **Disorders.** *Current Psychiatry Reports* 2019, **21**:10.
- 875 16. Sandell C, Kjellberg A, Taylor RR: **Participating in diagnostic experience: adults with**  
876 **neuropsychiatric disorders.** *Scandinavian Journal of Occupational Therapy* 2013, **20**:136-  
877 142.
- 878 17. Bray NJ, O'Donovan MC: **The genetics of neuropsychiatric disorders.** *Brain and neuroscience*  
879 *advances* 2018, **2**:2398212818799271.
- 880 18. Medalia A, Saperstein AM, Hansen MC, Lee S: **Personalised treatment for cognitive**  
881 **dysfunction in individuals with schizophrenia spectrum disorders.** *Neuropsychological*  
882 *rehabilitation* 2018, **28**:602-613.
- 883 19. Mora C, Zonca V, Riva MA, Cattaneo A: **Blood biomarkers and treatment response in major**  
884 **depression.** *Expert review of molecular diagnostics* 2018, **18**:513-529.
- 885 20. Anney RJL, Ripke S, Anttila V, Grove J, Holmans P, Huang H, Klei L, Lee PH, Medland SE, Neale  
886 B, et al: **Meta-analysis of GWAS of over 16,000 individuals with autism spectrum disorder**

- 887 **highlights a novel locus at 10q24.32 and a significant overlap with schizophrenia.**  
888 *Molecular Autism* 2017, **8**:21.
- 889 21. Grove J, Ripke S, Als TD, Mattheisen M, Walters RK, Won H, Pallesen J, Agerbo E, Andreassen  
890 OA, Anney R: **Identification of common genetic risk variants for autism spectrum disorder.**  
891 *Nature genetics* 2019, **51**:431-444.
- 892 22. Pardiñas AF, Holmans P, Pocklington AJ, Escott-Price V, Ripke S, Carrera N, Legge SE, Bishop  
893 S, Cameron D, Hamshere ML: **Common schizophrenia alleles are enriched in mutation-**  
894 **intolerant genes and in regions under strong background selection.** *Nature genetics* 2018,  
895 **50**:381.
- 896 23. Ripke S, Neale BM, Corvin A, Walters JT, Farh K-H, Holmans PA, Lee P, Bulik-Sullivan B, Collier  
897 DA, Huang H: **Biological insights from 108 schizophrenia-associated genetic loci.** *Nature*  
898 2014, **511**:421.
- 899 24. Stahl EA, Breen G, Forstner AJ, McQuillin A, Ripke S, Trubetskoy V, Mattheisen M, Wang Y,  
900 Coleman JR, Gaspar HA: **Genome-wide association study identifies 30 loci associated with**  
901 **bipolar disorder.** *Nature genetics* 2019, **51**:793-803.
- 902 25. Trubetskoy V, Pardiñas AF, Qi T, Panagiotaropoulou G, Awasthi S, Bigdeli TB, Bryois J, Chen  
903 C-Y, Dennison CA, Hall LS: **Mapping genomic loci implicates genes and synaptic biology in**  
904 **schizophrenia.** *Nature* 2022, **604**:502-508.
- 905 26. Zhu Z, Zhang F, Hu H, Bakshi A, Robinson MR, Powell JE, Montgomery GW, Goddard ME,  
906 Wray NR, Visscher PM: **Integration of summary data from GWAS and eQTL studies predicts**  
907 **complex trait gene targets.** *Nature genetics* 2016, **48**:481-487.
- 908 27. Sey NY, Hu B, Mah W, Fauni H, McAfee JC, Rajarajan P, Brennand KJ, Akbarian S, Won H: **A**  
909 **computational tool (H-MAGMA) for improved prediction of brain-disorder risk genes by**  
910 **incorporating brain chromatin interaction profiles.** *Nature Neuroscience* 2020, **23**:583-593.
- 911 28. Yang A, Chen J, Zhao X-M: **nMAGMA: a network-enhanced method for inferring risk genes**  
912 **from GWAS summary statistics and its application to schizophrenia.** *Briefings in*  
913 *bioinformatics* 2021, **22**:bbaa298.
- 914 29. Devlin B, Kelsoe JR, Sklar P, Daly MJ, O'Donovan MC, Craddock N, Sullivan PF, Smoller JW,  
915 Kendler KS: **Genetic relationship between five psychiatric disorders estimated from**  
916 **genome-wide SNPs.** *Nature genetics* 2013, **45**:984-994.
- 917 30. Hyde TM, Lipska BK, Ali T, Mathew SV, Law AJ, Metitiri OE, Straub RE, Ye T, Colantuoni C,  
918 Herman MM: **Expression of GABA signaling molecules KCC2, NKCC1, and GAD1 in cortical**  
919 **development and schizophrenia.** *Journal of Neuroscience* 2011, **31**:11088-11095.
- 920 31. Wang Z, Chen W, Cao Y, Dou Y, Fu Y, Zhang Y, Luo X, Kang L, Liu N, Shi YS, et al: **An**  
921 **independent, replicable, functional and significant risk variant block at intron 3 of**  
922 **CACNA1C for schizophrenia.** *Australian & New Zealand Journal of Psychiatry* 2022, **56**:385-  
923 397.
- 924 32. Steijger T, Abril JF, Engström PG, Kokocinski F, Hubbard TJ, Guigó R, Harrow J, Bertone P:  
925 **Assessment of transcript reconstruction methods for RNA-seq.** *Nature methods* 2013,  
926 **10**:1177-1184.
- 927 33. Amarasinghe SL, Su S, Dong X, Zappia L, Ritchie ME, Gouil Q: **Opportunities and challenges**  
928 **in long-read sequencing data analysis.** *Genome biology* 2020, **21**:1-16.
- 929 34. Glinos DA, Garborcauskas G, Hoffman P, Ehsan N, Jiang L, Gokden A, Dai X, Aguet F, Brown  
930 KL, Garimella K: **Transcriptome variation in human tissues revealed by long-read**  
931 **sequencing.** *Nature* 2022, **608**:353-359.
- 932 35. Clark MB, Wrzesinski T, Garcia AB, Hall NAL, Kleinman JE, Hyde T, Weinberger DR, Harrison  
933 PJ, Haerty W, Tunbridge EM: **Long-read sequencing reveals the complex splicing profile of**  
934 **the psychiatric risk gene CACNA1C in human brain.** *Molecular Psychiatry* 2020, **25**:37-47.
- 935 36. Ma L, Semick SA, Chen Q, Li C, Tao R, Price AJ, Shin JH, Jia Y, Consortium B, Brandon NJ:  
936 **Schizophrenia risk variants influence multiple classes of transcripts of sorting nexin 19**  
937 **(SNX19).** *Molecular psychiatry* 2020, **25**:831-843.

- 938 37. Li H: **Minimap2: pairwise alignment for nucleotide sequences**. *Bioinformatics* 2018,  
939 **34**:3094-3100.
- 940 38. Chen Y, Sim A, Wan YK, Yeo K, Lee JJX, Ling MH, Love MI, Göke J: **Context-aware transcript**  
941 **quantification from long-read RNA-seq data with Bambu**. *Nature Methods* 2023:1-9.
- 942 39. Tang AD, Soulette CM, van Baren MJ, Hart K, Hrabeta-Robinson E, Wu CJ, Brooks AN: **Full-**  
943 **length transcript characterization of SF3B1 mutation in chronic lymphocytic leukemia**  
944 **reveals downregulation of retained introns**. *Nature communications* 2020, **11**:1438.
- 945 40. Tian L, Jabbari JS, Thijssen R, Gouil Q, Amarasinghe SL, Voogd O, Kariyawasam H, Du MR,  
946 Schuster J, Wang C: **Comprehensive characterization of single-cell full-length isoforms in**  
947 **human and mouse with long-read sequencing**. *Genome biology* 2021, **22**:1-24.
- 948 41. Kovaka S, Zimin AV, Pertea GM, Razaghi R, Salzberg SL, Pertea M: **Transcriptome assembly**  
949 **from long-read RNA-seq alignments with StringTie2**. *Genome biology* 2019, **20**:1-13.
- 950 42. Tardaguila M, De La Fuente L, Marti C, Pereira C, Pardo-Palacios FJ, Del Risco H, Ferrell M,  
951 Mellado M, Macchietto M, Verheggen K: **SQANTI: extensive characterization of long-read**  
952 **transcript sequences for quality control in full-length transcriptome identification and**  
953 **quantification**. *Genome research* 2018, **28**:396-411.
- 954 43. Gasteiger E, Gattiker A, Hoogland C, Ivanyi I, Appel RD, Bairoch A: **ExpASY: the proteomics**  
955 **server for in-depth protein knowledge and analysis**. *Nucleic acids research* 2003, **31**:3784-  
956 3788.
- 957 44. Pihl R, Jensen RK, Poulsen EC, Jensen L, Hansen AG, Thøgersen IB, Dobó J, Gál P, Andersen  
958 GR, Enghild JJ: **ITIH4 acts as a protease inhibitor by a novel inhibitory mechanism**. *Science*  
959 *advances* 2021, **7**:eaba7381.
- 960 45. Jumper J, Evans R, Pritzel A, Green T, Figurnov M, Ronneberger O, Tunyasuvunakool K, Bates  
961 R, Židek A, Potapenko A: **Highly accurate protein structure prediction with AlphaFold**.  
962 *Nature* 2021, **596**:583-589.
- 963 46. Schreiner D, Nguyen T-M, Russo G, Heber S, Patrignani A, Ahrné E, Scheifflele P: **Targeted**  
964 **combinatorial alternative splicing generates brain region-specific repertoires of neurexins**.  
965 *Neuron* 2014, **84**:386-398.
- 966 47. Joglekar A, Prjibelski A, Mahfouz A, Collier P, Lin S, Schlusche AK, Marrocco J, Williams SR,  
967 Haase B, Hayes A, et al: **A spatially resolved brain region- and cell type-specific isoform**  
968 **atlas of the postnatal mouse brain**. *Nature Communications* 2021, **12**:463.
- 969 48. Kamran M, Laighneach A, Bibi F, Donohoe G, Ahmed N, Rehman AU, Morris DW:  
970 **Independent Associated SNPs at SORCS3 and Its Protein Interactors for Multiple Brain-**  
971 **Related Disorders and Traits**. *Genes* 2023, **14**:482.
- 972 49. Dong F, Wu C, Jiang W, Zhai M, Li H, Zhai L, Zhang X: **Cryo-EM structure studies of the**  
973 **human VPS10 domain-containing receptor SorCS3**. *Biochemical and Biophysical Research*  
974 *Communications* 2022, **624**:89-94.
- 975 50. Breiderhoff T, Christiansen GB, Pallesen LT, Vaegter C, Nykjaer A, Holm MM, Glerup S,  
976 Willnow TE: **Sortilin-related receptor SORCS3 is a postsynaptic modulator of synaptic**  
977 **depression and fear extinction**. *PLoS one* 2013, **8**:e75006.
- 978 51. Mirdita M, Schütze K, Moriwaki Y, Heo L, Ovchinnikov S, Steinegger M: **ColabFold: making**  
979 **protein folding accessible to all**. *Nature methods* 2022, **19**:679-682.
- 980 52. Mullins N, Forstner AJ, O'Connell KS, Coombes B, Coleman JR, Qiao Z, Als TD, Bigdeli TB,  
981 Børte S, Bryois J: **Genome-wide association study of more than 40,000 bipolar disorder**  
982 **cases provides new insights into the underlying biology**. *Nature genetics* 2021, **53**:817-829.
- 983 53. Kim M, Vo DD, Jops CT, Wen C, Patowary A, Bhattacharya A, Yap CX, Zhou H, Gandal MJ:  
984 **Multivariate variance components analysis uncovers genetic architecture of brain isoform**  
985 **expression and novel psychiatric disease mechanisms**. *medRxiv* 2022:2022.2010.  
986 2018.22281204.
- 987 54. Yeo G, Holste D, Kreiman G, Burge CB: **Variation in alternative splicing across human**  
988 **tissues**. *Genome biology* 2004, **5**:1-15.

- 989 55. Sarantopoulou D, Brooks TG, Nayak S, Mrčela A, Lahens NF, Grant GR: **Comparative**  
990 **evaluation of full-length isoform quantification from RNA-Seq.** *BMC bioinformatics* 2021,  
991 **22**:1-24.
- 992 56. Hu Y, Fang L, Chen X, Zhong JF, Li M, Wang K: **LIQA: long-read isoform quantification and**  
993 **analysis.** *Genome biology* 2021, **22**:182.
- 994 57. Zhang C, Zhang B, Lin L-L, Zhao S: **Evaluation and comparison of computational tools for**  
995 **RNA-seq isoform quantification.** *BMC genomics* 2017, **18**:1-11.
- 996 58. Arendt-Tranholm A, Mwirigi JM, Price TJ: **RNA isoform expression landscape of the human**  
997 **dorsal root ganglion (DRG) generated from long read sequencing.** *bioRxiv* 2023:2023.2010.  
998 2028.564535.
- 999 59. Ganley IG, Lam DH, Wang J, Ding X, Chen S, Jiang X: **ULK1· ATG13· FIP200 complex mediates**  
1000 **mTOR signaling and is essential for autophagy.** *Journal of Biological Chemistry* 2009,  
1001 **284**:12297-12305.
- 1002 60. Alers S, Löffler AS, Paasch F, Dieterle AM, Keppeler H, Lauber K, Campbell DG, Fehrenbacher  
1003 B, Schaller M, Wesselborg S, Stork B: **Atg13 and FIP200 act independently of Ulk1 and Ulk2**  
1004 **in autophagy induction.** *Autophagy* 2011, **7**:1424-1433.
- 1005 61. Leppek K, Das R, Barna M: **Functional 5' UTR mRNA structures in eukaryotic translation**  
1006 **regulation and how to find them.** *Nature reviews Molecular cell biology* 2018, **19**:158-174.
- 1007 62. Baum ML, Wilton DK, Fox RG, Carey A, Hsu Y-HH, Hu R, Jääntti HJ, Fahey JB, Muthukumar AK,  
1008 Salla N: **CSMD1 regulates brain complement activity and circuit development.** *Brain,*  
1009 *Behavior, and Immunity* 2024.
- 1010 63. Hong S, Beja-Glasser VF, Nfonoyim BM, Frouin A, Li S, Ramakrishnan S, Merry KM, Shi Q,  
1011 Rosenthal A, Barres BA: **Complement and microglia mediate early synapse loss in**  
1012 **Alzheimer mouse models.** *Science* 2016, **352**:712-716.
- 1013 64. Alsabban AH, Morikawa M, Tanaka Y, Takei Y, Hirokawa N: **Kinesin Kif3b mutation reduces**  
1014 **NMDAR subunit NR 2A trafficking and causes schizophrenia-like phenotypes in mice.** *The*  
1015 *EMBO Journal* 2020, **39**:e101090.
- 1016 65. Woźniak MJ, Allan VJ: **Cargo selection by specific kinesin light chain 1 isoforms.** *The EMBO*  
1017 *Journal* 2006, **25**:5457-5468.
- 1018 66. Imbrici P, Conte Camerino D, Tricarico D: **Major channels involved in neuropsychiatric**  
1019 **disorders and therapeutic perspectives.** *Frontiers in Genetics* 2013, **4**.
- 1020 67. Guzman RE, Miranda-Laferte E, Franzen A, Fahlke C: **Neuronal CIC-3 splice variants differ in**  
1021 **subcellular localizations, but mediate identical transport functions.** *Journal of Biological*  
1022 *Chemistry* 2015, **290**:25851-25862.
- 1023 68. Duncan AR, Polovitskaya MM, Gaitán-Peñas H, Bertelli S, VanNoy GE, Grant PE, O'Donnell-  
1024 Luria A, Valivullah Z, Lovgren AK, England EM: **Unique variants in CLCN3, encoding an**  
1025 **endosomal anion/proton exchanger, underlie a spectrum of neurodevelopmental**  
1026 **disorders.** *The American Journal of Human Genetics* 2021, **108**:1450-1465.
- 1027 69. Roca-Umbert A, Garcia-Calleja J, Vogel-González M, Fierro-Villegas A, Ill-Raga G, Herrera-  
1028 Fernández V, Bosnjak A, Muntané G, Gutiérrez E, Campelo F: **Human genetic adaptation**  
1029 **related to cellular zinc homeostasis.** *Plos Genetics* 2023, **19**:e1010950.
- 1030 70. Perez Y, Shorer Z, Liani-Leibson K, Chabosseau P, Kadir R, Volodarsky M, Halperin D, Barber-  
1031 Zucker S, Shalev H, Schreiber R: **SLC30A9 mutation affecting intracellular zinc homeostasis**  
1032 **causes a novel cerebro-renal syndrome.** *Brain* 2017, **140**:928-939.
- 1033 71. Willekens J, Runnels LW: **Impact of Zinc Transport Mechanisms on Embryonic and Brain**  
1034 **Development.** *Nutrients* 2022, **14**:2526.
- 1035 72. Lee J, Joo E-J, Lim H-J, Park J-M, Lee KY, Park A, Seok A, Lee H, Kang H-G: **Proteomic analysis**  
1036 **of serum from patients with major depressive disorder to compare their depressive and**  
1037 **remission statuses.** *Psychiatry investigation* 2015, **12**:249.
- 1038 73. Piñeiro M, Andrés M, Iturralde M, Carmona S, Hirvonen J, Pyörälä S, Heegaard PMH,  
1039 Tjørnehøj K, Lampreave F, Piñeiro A, Alava MA: **ITI4H (Inter-Alpha-Trypsin Inhibitor Heavy**

- 1040 **Chain 4) Is a New Acute-Phase Protein Isolated from Cattle during Experimental Infection.**  
1041 *Infection and Immunity* 2004, **72**:3777-3782.
- 1042 74. Praver YD, Gleeson J, De Paoli-Iseppi R, Clark MB: **Pervasive effects of RNA degradation on**  
1043 **Nanopore direct RNA sequencing.** *NAR Genomics and Bioinformatics* 2023, **5**:lqad060.
- 1044 75. Harrison PJ, Heath PR, Eastwood SL, Burnet PWJ, McDonald B, Pearson RCA: **The relative**  
1045 **importance of premortem acidosis and postmortem interval for human brain gene**  
1046 **expression studies: selective mRNA vulnerability and comparison with their encoded**  
1047 **proteins.** *Neuroscience Letters* 1995, **200**:151-154.
- 1048 76. Karst SM, Ziels RM, Kirkegaard RH, Sørensen EA, McDonald D, Zhu Q, Knight R, Albertsen M:  
1049 **High-accuracy long-read amplicon sequences using unique molecular identifiers with**  
1050 **Nanopore or PacBio sequencing.** *Nature methods* 2021, **18**:165-169.
- 1051 77. Hess JL, Tylee DS, Mattheisen M, Børglum AD, Als TD, Grove J, Werge T, Mortensen PB: **A**  
1052 **polygenic resilience score moderates the genetic risk for schizophrenia.** *Molecular*  
1053 *psychiatry* 2021, **26**:800-815.
- 1054 78. Pozo F, Martinez-Gomez L, Walsh TA, Rodriguez JM, Di Domenico T, Abascal F, Vazquez J,  
1055 Tress ML: **Assessing the functional relevance of splice isoforms.** *NAR Genomics and*  
1056 *Bioinformatics* 2021, **3**:lqab044.
- 1057 79. Amaral P, Carbonell-Sala S, De La Vega FM, Faial T, Frankish A, Gingeras T, Guigo R, Harrow  
1058 JL, Hatzigeorgiou AG, Johnson R, et al: **The status of the human gene catalogue.** *Nature*  
1059 2023, **622**:41-47.
- 1060 80. Frankish A, Carbonell-Sala S, Diekhans M, Jungreis I, Loveland JE, Mudge JM, Sisu C, Wright  
1061 JC, Arnan C, Barnes I: **GENCODE: reference annotation for the human and mouse genomes**  
1062 **in 2023.** *Nucleic acids research* 2023, **51**:D942-D949.
- 1063 81. Buniello A, MacArthur JAL, Cerezo M, Harris LW, Hayhurst J, Malangone C, McMahon A,  
1064 Morales J, Mountjoy E, Sollis E: **The NHGRI-EBI GWAS Catalog of published genome-wide**  
1065 **association studies, targeted arrays and summary statistics 2019.** *Nucleic acids research*  
1066 2019, **47**:D1005-D1012.
- 1067 82. Nassar LR, Barber GP, Benet-Pagès A, Casper J, Clawson H, Diekhans M, Fischer C, Gonzalez  
1068 JN, Hinrichs AS, Lee BT: **The UCSC genome browser database: 2023 update.** *Nucleic acids*  
1069 *research* 2023, **51**:D1188-D1195.
- 1070 83. Untergasser A, Nijveen H, Rao X, Bisseling T, Geurts R, Leunissen JA: **Primer3Plus, an**  
1071 **enhanced web interface to Primer3.** *Nucleic acids research* 2007, **35**:W71-W74.
- 1072 84. Bushnell B: **BBMap: a fast, accurate, splice-aware aligner.** Lawrence Berkeley National  
1073 Lab.(LBNL), Berkeley, CA (United States); 2014.
- 1074 85. Quinlan AR: **BEDTools: the Swiss-army tool for genome feature analysis.** *Current protocols*  
1075 *in bioinformatics* 2014, **47**:11.12. 11-11.12. 34.
- 1076 86. Perteu G, Perteu M: **GFF utilities: GffRead and GffCompare.** *F1000Research* 2020, **9**.
- 1077 87. Patro R, Duggal G, Love MI, Irizarry RA, Kingsford C: **Salmon provides fast and bias-aware**  
1078 **quantification of transcript expression.** *Nature methods* 2017, **14**:417-419.
- 1079 88. Ye J, Coulouris G, Zaretskaya I, Cutcutache I, Rozen S, Madden TL: **Primer-BLAST: a tool to**  
1080 **design target-specific primers for polymerase chain reaction.** *BMC bioinformatics* 2012,  
1081 **13**:1-11.
- 1082 89. Eng JK, McCormack AL, Yates JR: **An approach to correlate tandem mass spectral data of**  
1083 **peptides with amino acid sequences in a protein database.** *J Am Soc Mass Spectrom* 1994,  
1084 **5**:976-989.
- 1085 90. Pettersen EF, Goddard TD, Huang CC, Meng EC, Couch GS, Croll TI, Morris JH, Ferrin TE: **UCSF**  
1086 **ChimeraX: Structure visualization for researchers, educators, and developers.** *Protein*  
1087 *Science* 2021, **30**:70-82.
- 1088 91. Lonsdale J, Thomas J, Salvatore M, Phillips R, Lo E, Shad S, Hasz R, Walters G, Garcia F, Young  
1089 N: **The genotype-tissue expression (GTEx) project.** *Nature genetics* 2013, **45**:580-585.

1090

1091



## 1092 Supplementary Figures

### 1093 Supplementary Figure 1. Mental health disorder (MHD) risk gene list curation pipeline. **A.**

1094 Single nucleotide polymorphism (SNP) catalogues form the foundation of the final risk gene evidence  
 1095 lists used to select genes for amplicon sequencing. These catalogues are collated from up-to-date,  
 1096 large-scale genome wide association studies (GWAS) of MHDs. A single GWAS catalogue was  
 1097 downloaded for schizophrenia (SZ), major depressive disorder (MDD), bipolar disorder (BD) and  
 1098 autism spectrum disorder (ASD), and associations were filtered according to criteria in Supplementary  
 1099 Table 4. GWAS data generally had either a mapped or reported gene associated with each SNP.  
 1100 Further evidence (i.e. reported genes) from categorised literature sources (shown in green) was then  
 1101 added to the list. This list was then sorted (high to low) by the number of occurrences of a risk gene in  
 1102 unique studies across all evidence/validation categories. No weighting was applied to any category. A  
 1103 multi-trait list was also made containing evidence for risk genes across all four MHDs so shared risk  
 1104 genes could be identified. **B.** An example of additional risk gene information included in the list e.g.  
 1105 for *GNL3*, count of known transcripts, count of coding exons for the canonical isoform, length in  
 1106 nucleotides (nt), length of protein in amino acids (aa) and the categorised Genotype-Tissue  
 1107 Expression (GTEx) in transcript per million (TPM) for each brain tissue [91]. *Definitions:* multi-  
 1108 marker analysis of Genomic annotation (MAGMA), summary-based Mendelian randomisation  
 1109 (SMR), transcriptome wide association study (TWAS).

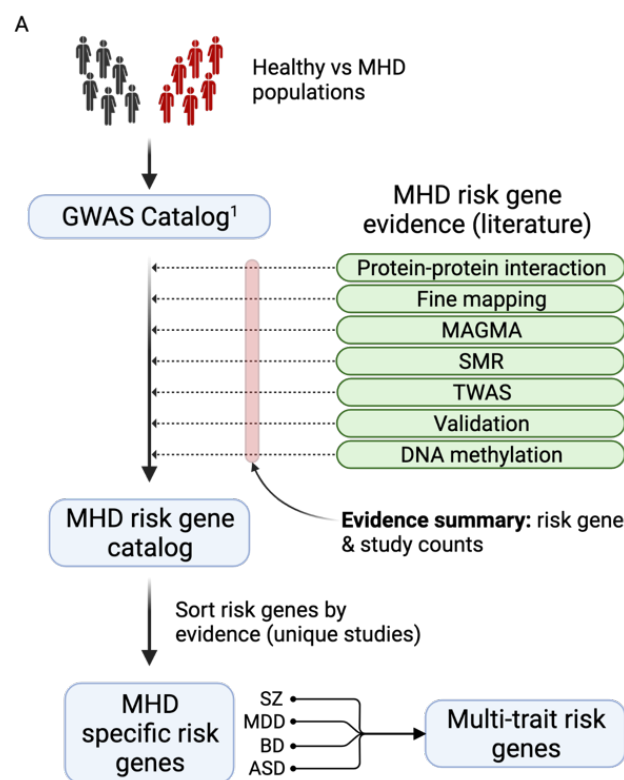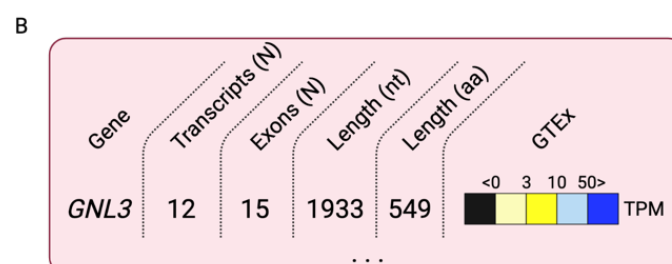

1110 **Supplementary Figure 2.** Experimental design of SIRV amplicon controls. E0, E1 and E2 represent  
1111 each SIRV mix of known isoform concentrations. Each mix was converted into cDNA in triplicate  
1112 and finally, the full length of synthetic genes SIRV5 and 6 were amplified using PCR in triplicate for  
1113 each cDNA replicate.

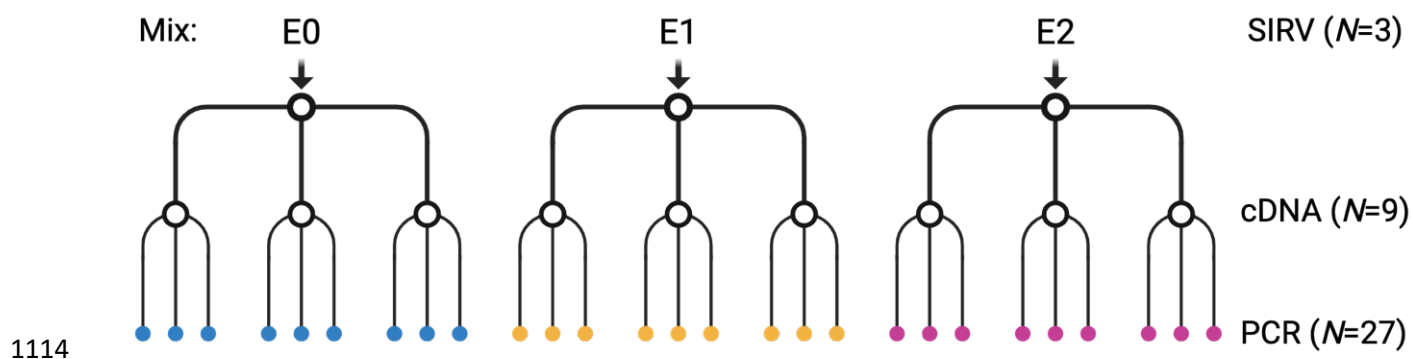

1115 **Supplementary Figure 3. Benchmarking IsoLamp using spike-in SIRVs and the optimised**  
 1116 **IsoLamp expression-based filter. A.** Precision recall of each tested pipeline with the complete,  
 1117 insufficient or over annotated SIRV reference, filtering all results using the IsoLamp expression-based  
 1118 filter. IsoLamp (black) returned high quality isoforms from amplicon data of both SIRV5 and 6.  
 1119 Pearson **(B)** and Spearman **(C)** correlations for each pipeline between known and observed expression  
 1120 values for SIRV 5 and 6 mixes.

1121

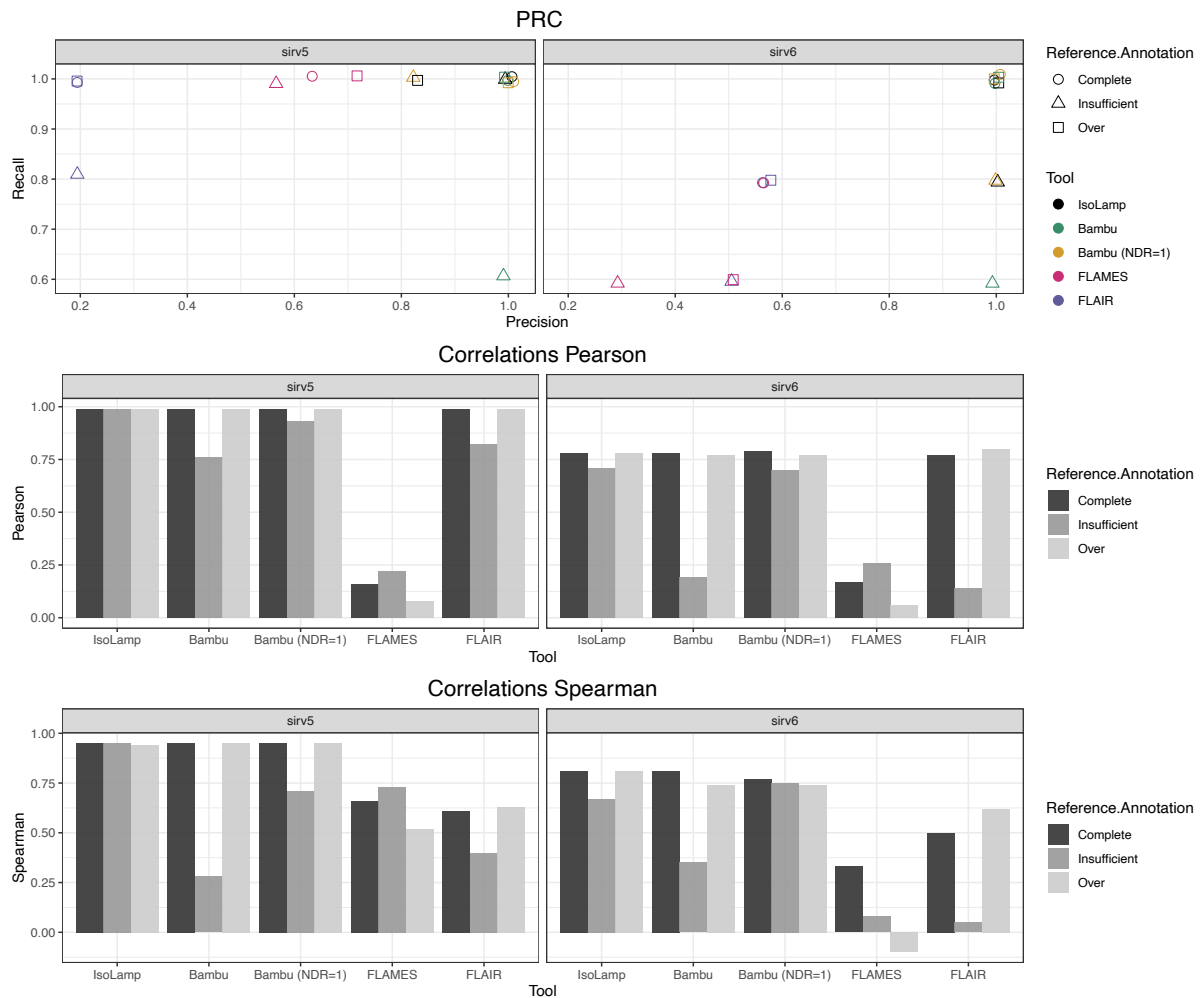

1122

1123 **Supplementary Figure 4. Post-mortem human brain RNA QC.** **A.** Yield of isolated total  
1124 RNA generally increases with increased tissue weight (mg) input to homogenisation using the  
1125 RNeasy Lipid Tissue Mini Kit (QIAGEN:74804). **B.** The RNA integrity number equivalent  
1126 (RINe) for brain tissue was generally between 7 – 8. RINe from individual (Ind) 04 was  
1127 significantly lower when compared to individuals 01 ( $p=0.0259$ ) and 05 ( $p=0.0433$ ). One way  
1128 ANOVA:  $F=6.224$ ,  $DF=6$ . **C.** No correlation was detected between RNA quality (RINe) and  
1129 individual post-mortem interval (PMI). **D.** Decreasing individual brain pH appears to impact  
1130 RINe. Half-fill circles indicate samples from individual 04 (pH = 6.3). Filled circles indicate  
1131 degraded RNA isolated from individual 06 (female)w which was not included for further  
1132 analysis. Data in B, C and D are staggered for clarity.

1133 **A**

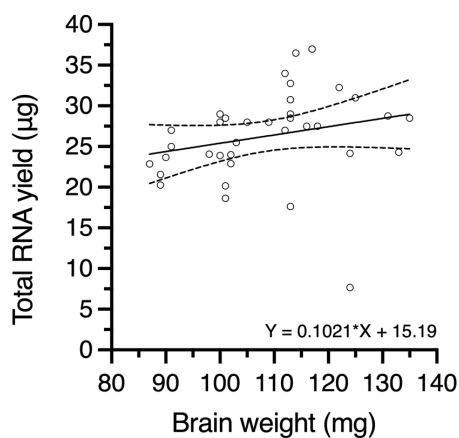

**B**

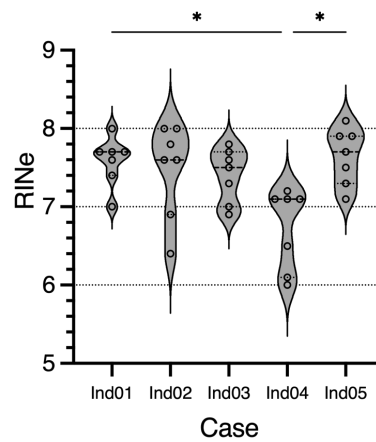

1134 **C**

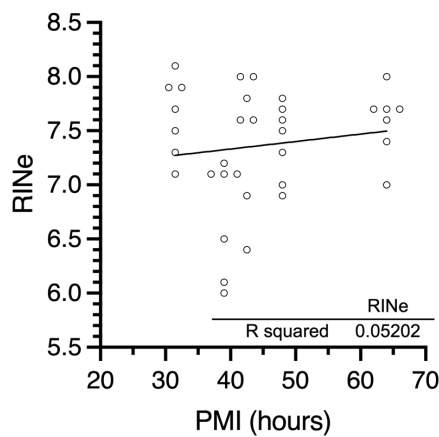

**D**

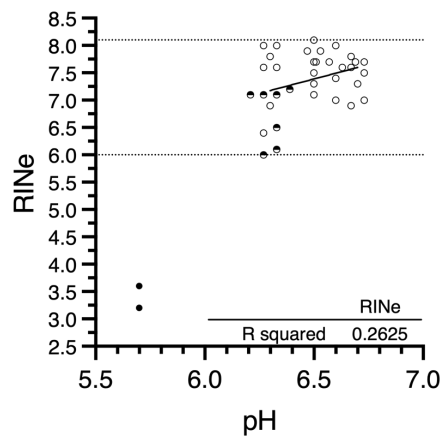

1136 **Supplementary Figure 5. Principal component analyses (PCA) of brain samples.** PC1 and PC2  
1137 coloured by brain region (A) and RNA integrity (RIN) (B). C. PC4 and PC5 coloured by donor age  
1138 (years). Key: individual (IND), Brodmann's area (BA), caudate (caud), cerebellum (cbm) and  
1139 temporal cortex (TCX).

1140 **A**

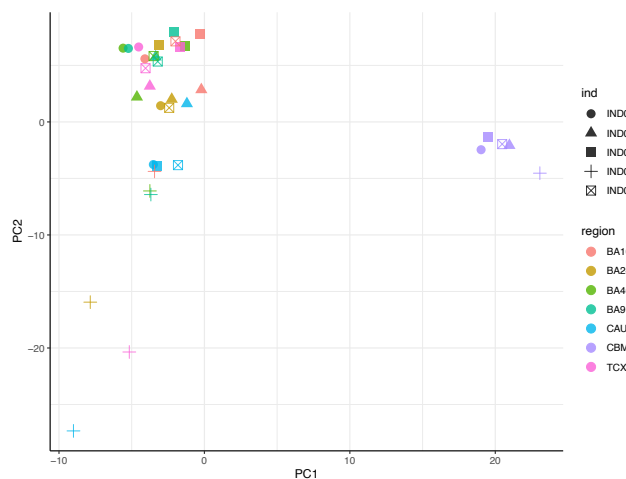

1141

1142 **B**

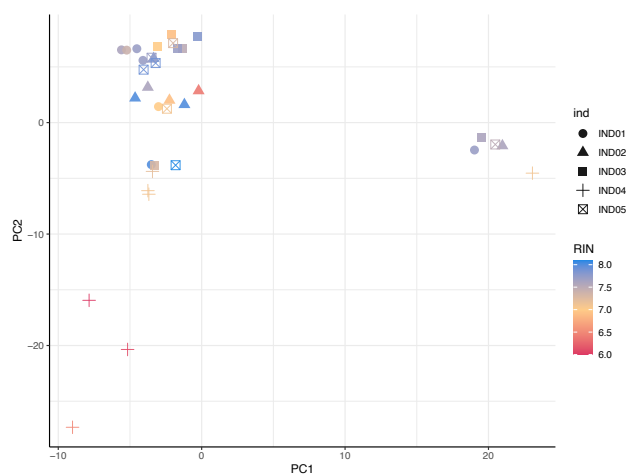

1143

1144 **C**

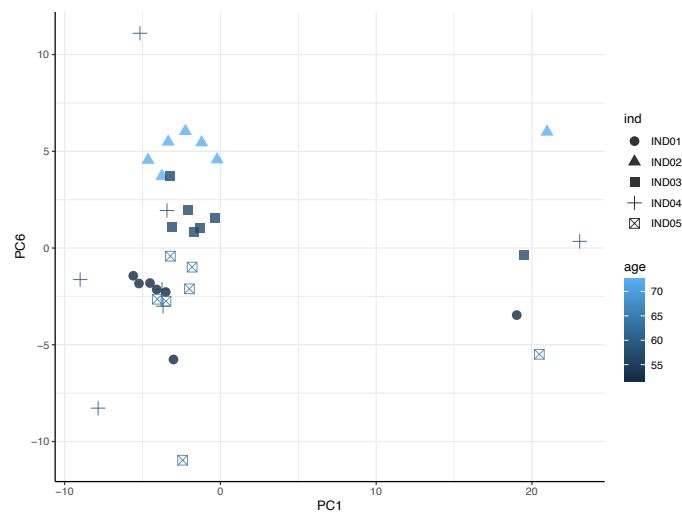

1145 **Supplementary Figure 6. Long-read amplicon mapping accuracy. A.** All sequenced risk genes.  
 1146 Plotted range 0.85 – 1.00. **B.** A box and whiskers plot of the median accuracy for each risk gene.  
 1147 Open circles indicate the library was prepared with ligation sequencing kit 110 (ONT). Colours  
 1148 indicate flow cells (prefix: FAL) that were used for multiple long-read libraries (N=3-5).

1149 **A**

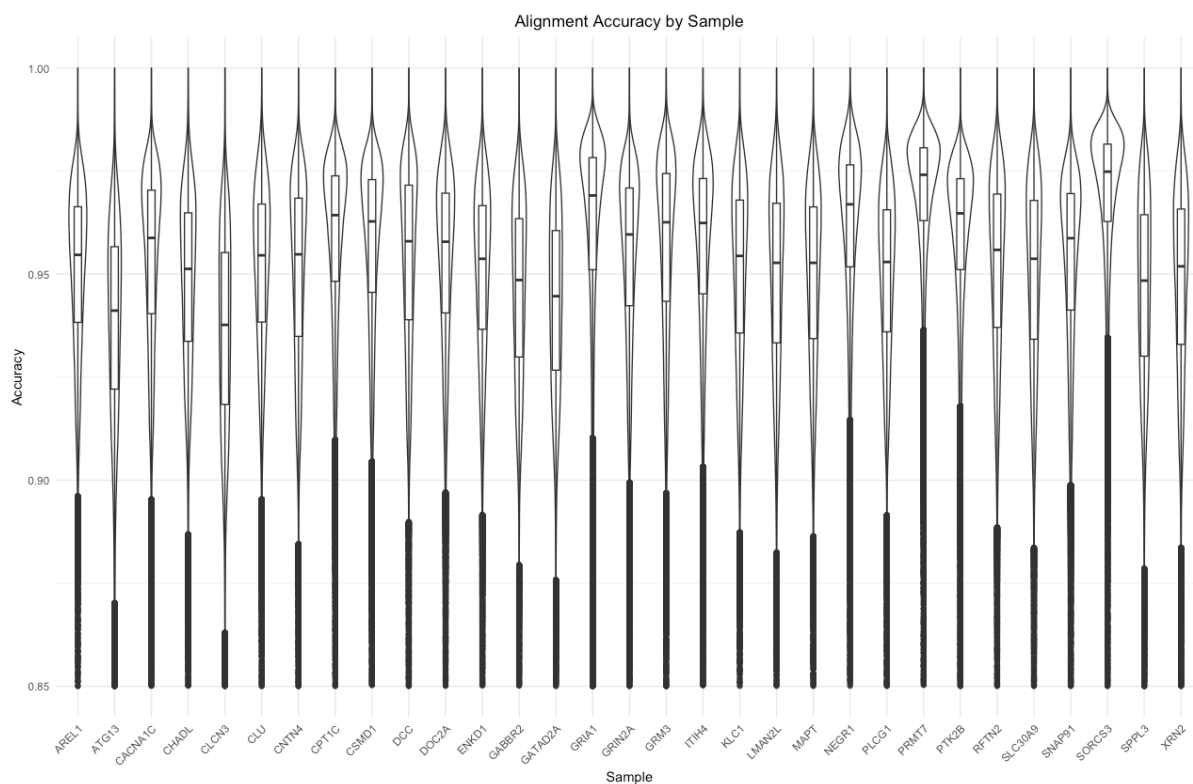

1150

1151 **B**

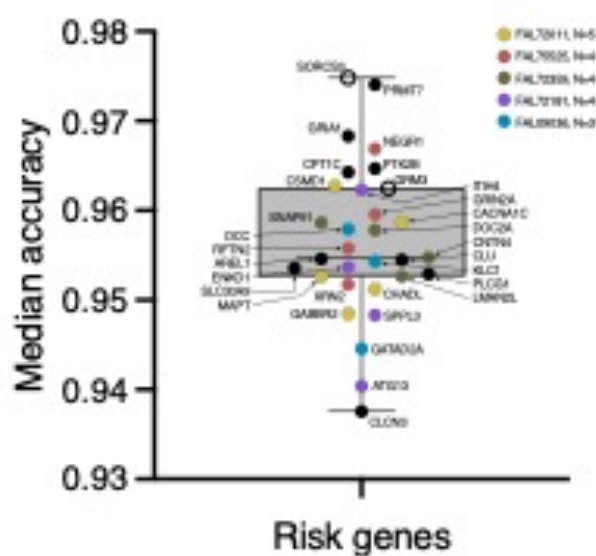

1152

1153 **Supplementary Figure 7. Risk gene isoform counts.** The number of detected isoforms (known and  
 1154 novel) is shown for each risk gene sorted from lowest (*GRIN2A*) to highest (*ITIH4*). Each isoform was  
 1155 classified into a SQANTI subcategory: reference match (RM), containing at least one novel splice site  
 1156 (ALO), retained intron (RI), combination of known junctions (COJ) or splice sites (COS). Known  
 1157 (RM) isoform counts are plotted on the right Y-axis and novel isoform counts are plotted on the left  
 1158 Y-axis.

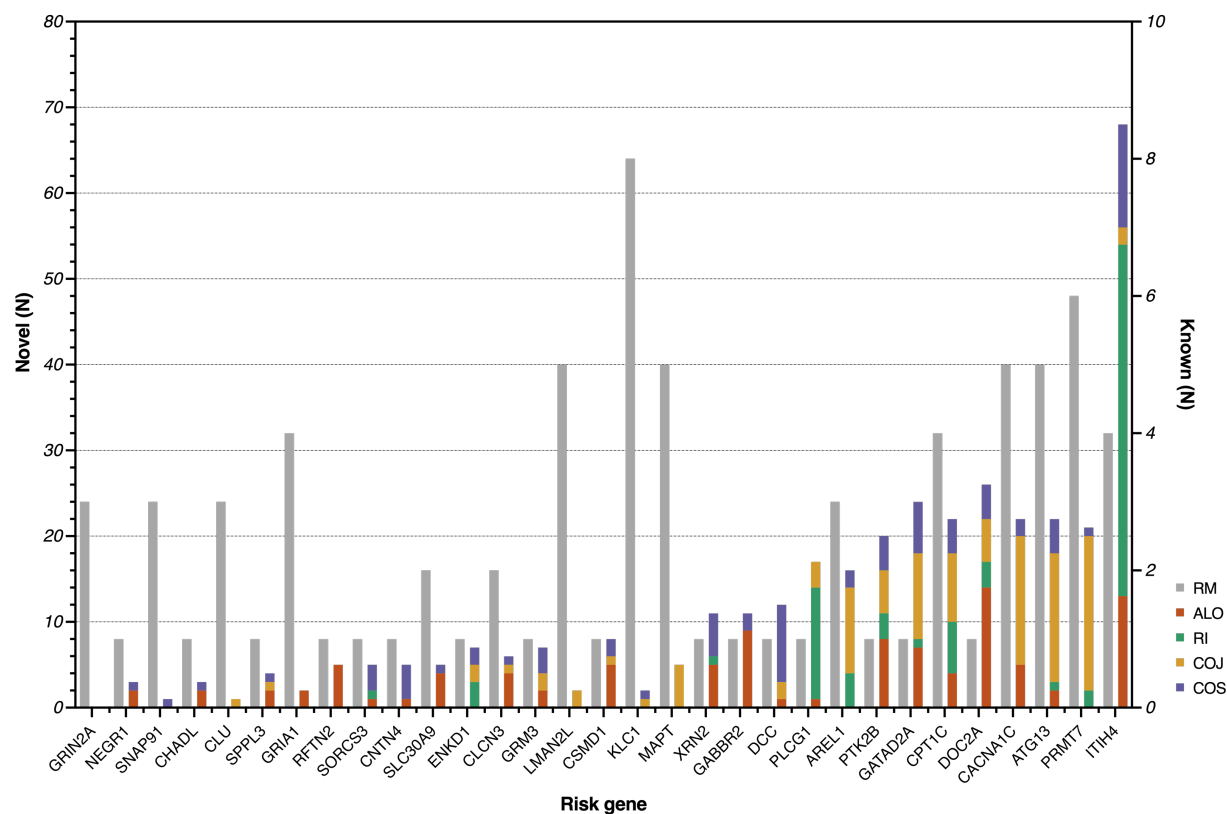

1159

1160

1161 **Supplementary Figure 8. Linear regression of amplicon length or canonical exon count against**  
1162 **isoform count and novel isoform TPM proportion does not deviate significantly from zero.**  
1163 Linear regression of known and novel isoform counts with expected canonical amplicon length (A)  
1164 and number of canonical exons (B). Linear regression of novel isoform read proportion with expected  
1165 canonical amplicon length (C) and number of canonical exons (D).

1166 **A**

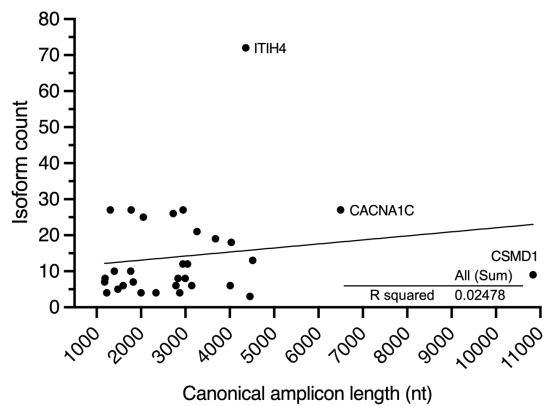

**B**

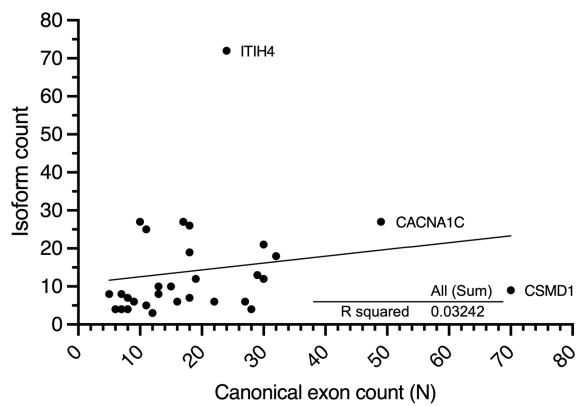

**C**

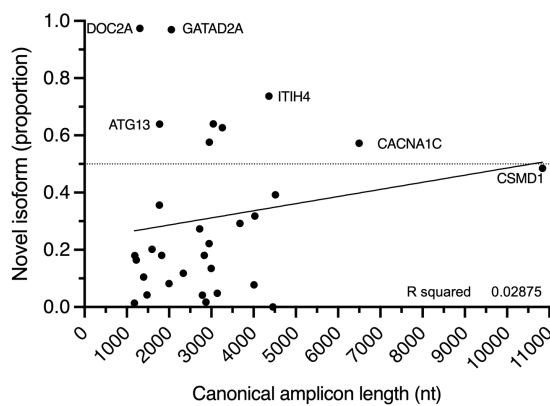

**D**

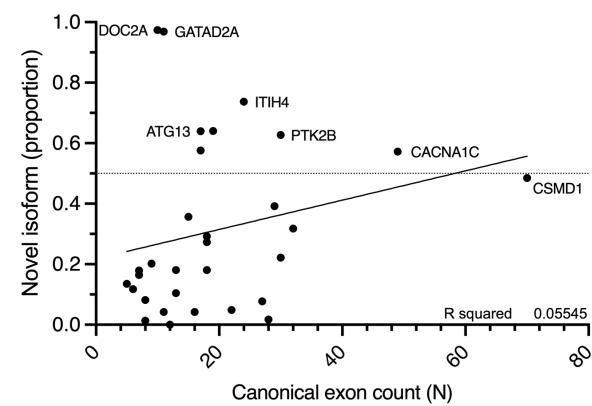



1171 **Supplementary Figure 9. A.** Count of novel isoform splice pairing. Isoforms classified as containing  
 1172 at least one novel splice site (ALO) were examined and the novel pair or donor/acceptor was counted.  
 1173 Duplicates were counted only once. **B.** UCSC screenshot of an example novel splice acceptor (red  
 1174 box, GT/AG, +98 nt) detected in two novel isoforms (Tx 11 and 23) in canonical exon 17 (blue box)  
 1175 for the schizophrenia risk gene *CPTIC*.

1176 **A**

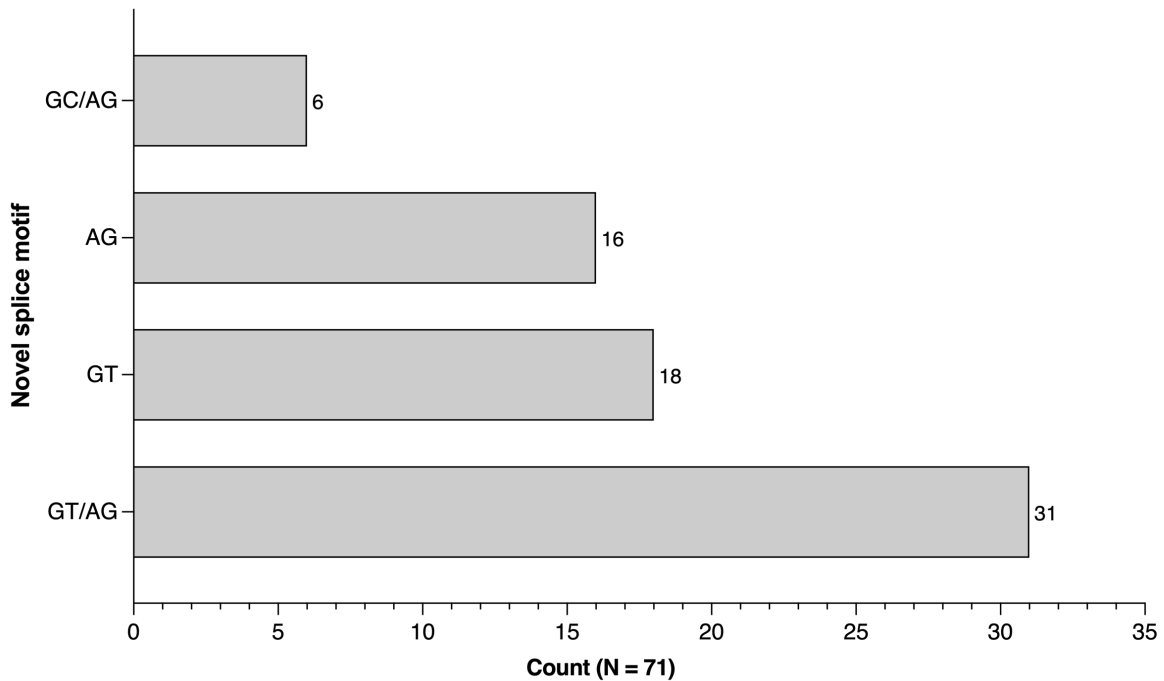

1177

1178 **B**

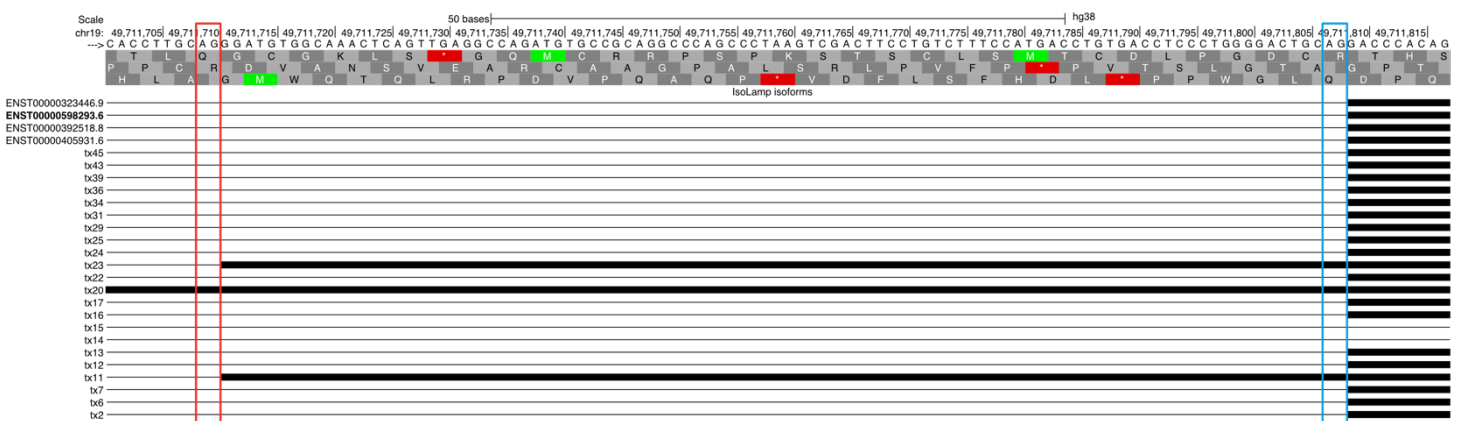

1179

1180 **Supplementary Figure 10. UCSC screenshot of *CACNA1C* splicing hotspot.** Long-read  
1181 sequencing identified 10 novel isoforms (black tracks) that support one of two annotated alternative  
1182 splicing events (yellow boxes) within a 12 nt region (chr12:2,493,190-2,493,201) of exon 7 in  
1183 *CACNA1C*. 11 novel isoforms also supported the use of the canonical (ENST00000399655.6)  
1184 acceptor site (green box).

1185

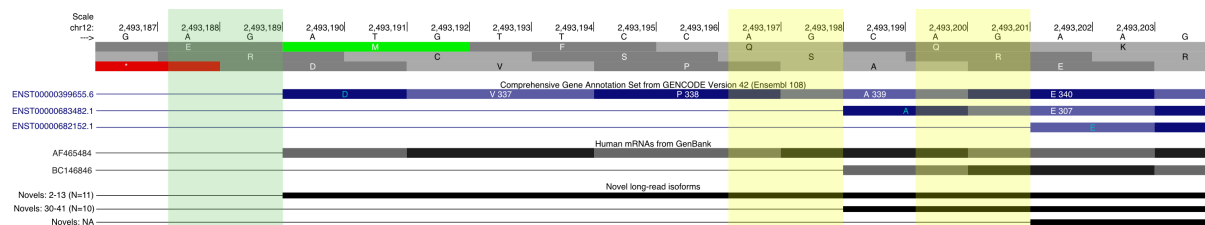

1186

1187

1188 **Supplementary Figure 11.** Annotated MS/MS spectrum highlighting matched b- and y-type ions  
 1189 providing proteomic [ETLFSVMPG//PVLPGGALGISSIR] evidence for novel skipping of canonical  
 1190 exon 22 in *ITIH4* detected using long-reads.

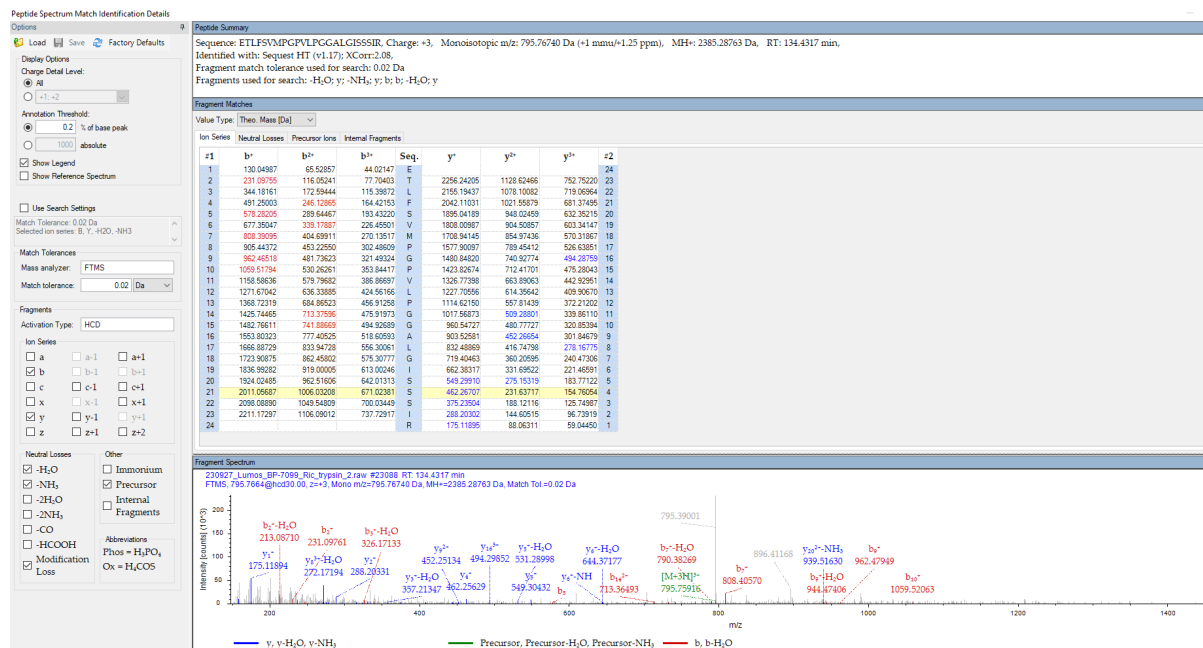

1191

1192 **Supplementary Figure 12. *NEGR1* splice isoforms and protein prediction.** **A.** *NEGR1* novel exons  
1193 were validated using Sanger sequencing of PCR amplicons and sequence reads were aligned and  
1194 viewed using UCSC Genome Browser. Orange boxes indicate the novel exons and highlight high  
1195 vertebrate conservation for exon 6b and predicted (NCBI RefSeq) termination site for exon 6a. **B.**  
1196 AlphaFold protein prediction of the canonical *NEGR1* isoform (ENST00000357731). Three Ig-like  
1197 domains are coloured according to the reported amino-acid positions (UniProt: Q7Z3B1); 1 (orange),  
1198 2 (blue) and 3 (pink). A GPI anchor residue (red) is shown at position 324 aa (C-terminal, red arrow).  
1199 **C.** Overlaid AlphaFold protein predictions of novel Tx1 (purple) and Tx2 (orange). Ig-like domains  
1200 are numbered 1-3, the GPI anchor (red) is present in Tx1 and the termination of Tx is indicated by a  
1201 red arrow. Novel residues (pink) are indicated at the C-terminal end for both transcripts, Tx1: 14 aa  
1202 and Tx2: 7 aa.

1203 **A**

1204

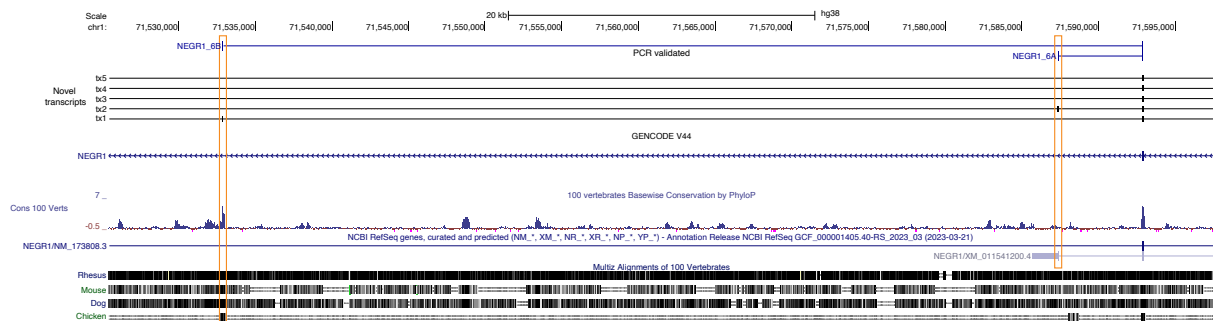

1205

1206

1207 **B**

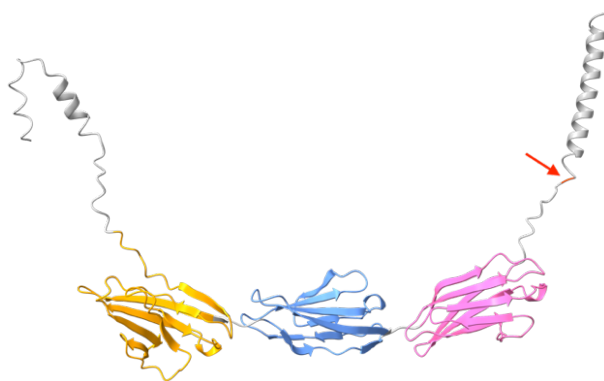

1208

1209 **C**

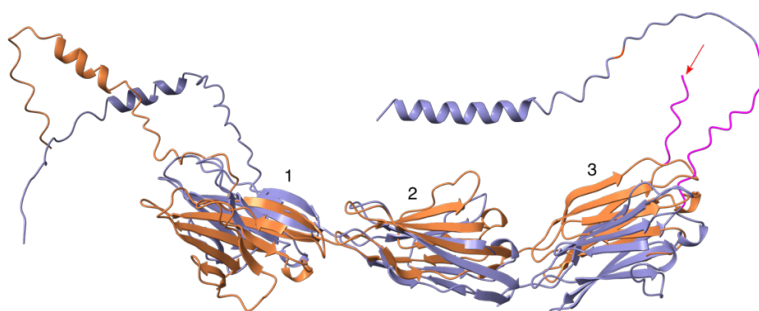

1210

1211 **Supplementary Figure 13A. Novel exon validation in *CLCN3*.** Novel exon 2a in the schizophrenia  
 1212 risk gene *CLCN3*, identified in long-read sequencing data, was validated by PCR using primers  
 1213 designed in the flanking cassette exons 1 and 3 (ENST00000513761). The novel exon sequence  
 1214 shown in novel transcript (Tx) 2 was validated with Sanger sequencing from the 5' canonical exon 2  
 1215 (C2F1) to the reverse primer within the novel sequence (N2aR1) and from the novel sequence  
 1216 (N2aF1) to the 3' canonical exon 3 (C3R1). Direction of reads are indicated with arrows. Black and  
 1217 orange boxes indicate forward and reverse Sanger sequence respectively. Blue boxes indicate forward  
 1218 and reverse primers within the novel exon. A known cytoplasmic domain is shown by an orange  
 1219 track. Key: expressed sequence tag (EST). **B. Novel exon categories.** The impact of novel exon  
 1220 inclusion on the open reading frame of novel isoforms was predicted using Expsy [43] and then  
 1221 classed into groups, predicted to retain the open reading frame (ORF), inclusion of premature  
 1222 termination codon or 'poison exon' that was predicted to lead to nonsense-mediated decay (PE:NMD)  
 1223 or was <50 nt from the final exon junction (PE: <50 nt) or was with the 5' or 3' untranslated regions  
 1224 (UTR).

1225 **A**

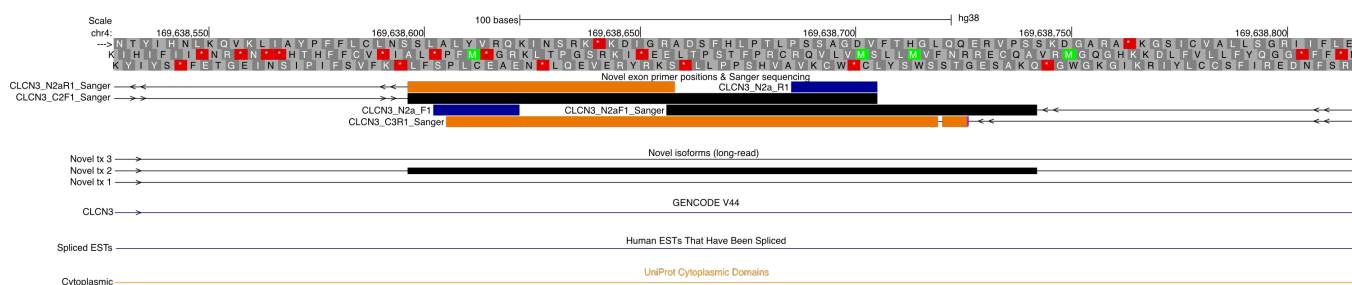

1226

1227 **B**

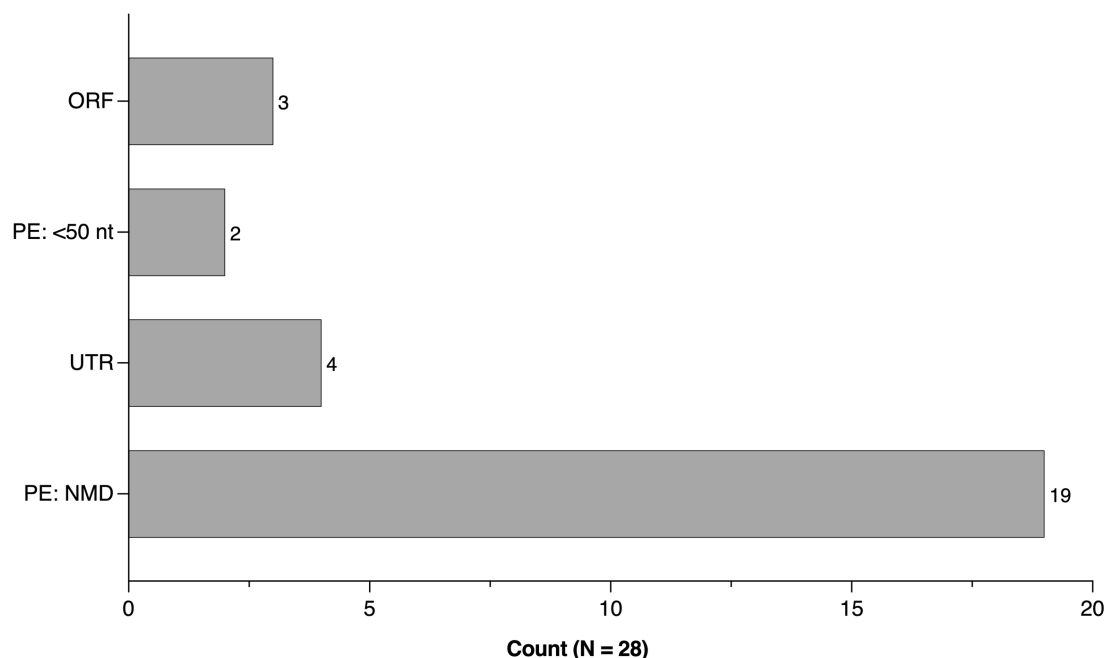

1228

1229 **Supplementary Figure 14. Splice graph of *XRN2* novel isoforms containing novel exons.** Dark  
1230 and light grey boxes indicate 5' and 3' UTR and coding exons respectively. Orange lines and boxes  
1231 indicate novel splicing events and exons. Novel transcript 1 (Tx1) contains a novel splice acceptor  
1232 (AG) within exon 14 (+24 nt) leading to a premature termination codon (PTC) and predicted nonsense  
1233 mediated decay. Novel transcript 2 (Tx2) includes the validated novel exon 16a (54 nt) which was  
1234 also predicted to encode a PTC. Novel isoform 3 (Tx3) contains a validated novel exon (29a) which  
1235 encodes a PTC <50 nt from the final exon junction. Tx3 was predicted to lead to a truncated protein  
1236 (934 aa). “..” indicates 0’s removed for brevity.

1237

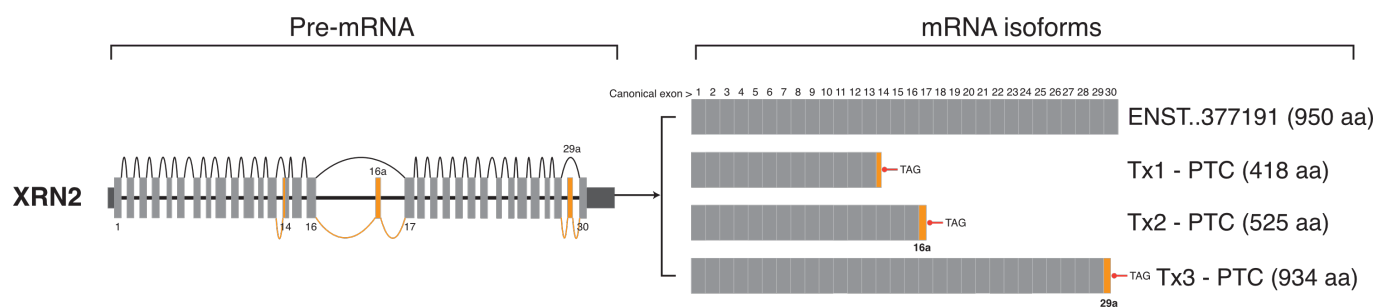

1238

1239

1240 **Supplementary Figure 15. *SORCS3* novel exon and protein structure predictions.** **A.** AlphaFold  
1241 prediction of *SORCS3* canonical isoform (ENST00000369701.8: Q17R88) coloured by domain:  $\beta$ -  
1242 propeller (blue), 10CC domain domains (green), polycystic kidney disease (PKD) domains PKD1  
1243 (orange) and PKD2 (yellow), SorCS membrane proximal (SoMP) (red) and transmembrane domain  
1244 (pink). **B.** Zoomed view of the PKD2 domain indicating LYS:956 (blue) and PRO:957 (orange) where  
1245 frame-retaining novel exon 20a (60 nt) is inserted. **C.** Protein structure prediction of novel transcript 1  
1246 (Tx1) containing the novel exon (blue) within the PKD2 domain (yellow). **D.** AlphaFold per-residue  
1247 confidence scores (pLDDT) (0-100) for novel transcript 1: very high (>90, blue), confident (90-70,  
1248 light-blue), low (70>50, yellow) and very low (<50, orange).

1249

1250 **A**

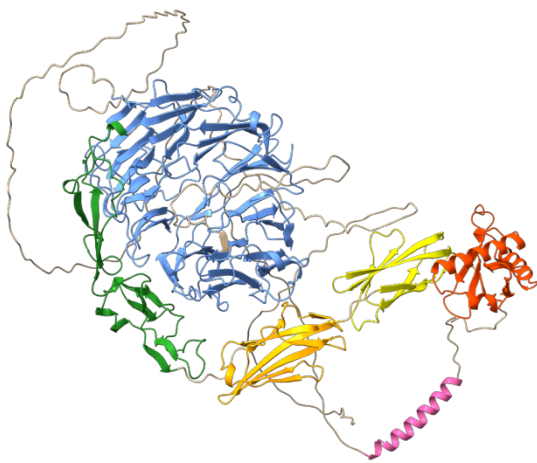

**B**

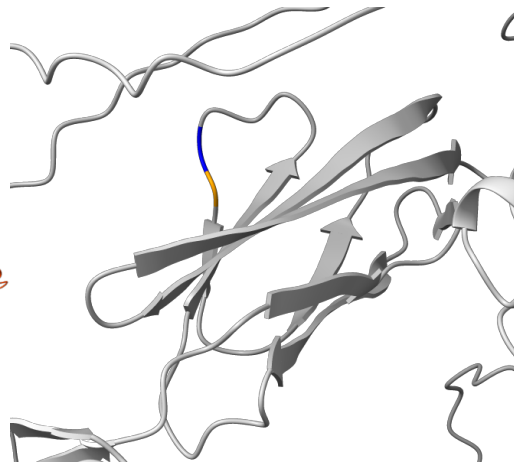

1251

1252

1253 **C**

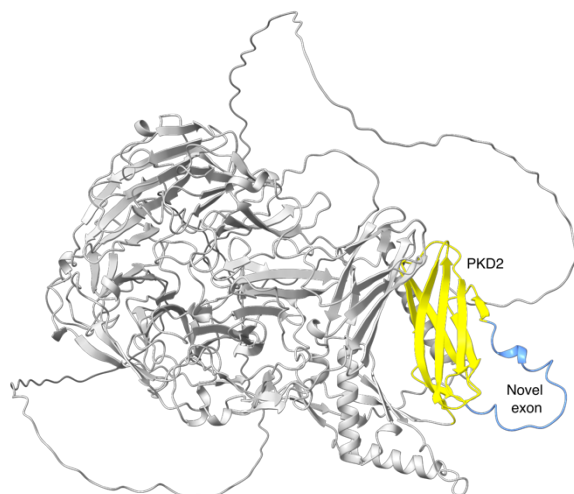

**D**

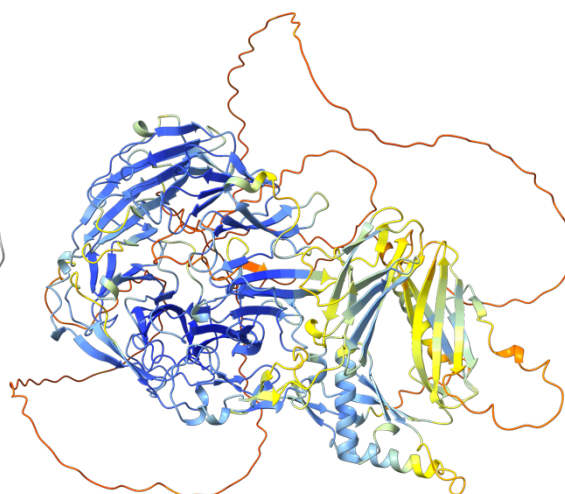

1254
